# Supplementary material
Source: PubMed Central journal article supplement (PMC4070946)
Supplement: NIHMS523061-supplement-01.pdf [file NIHMS523061-supplement-01.pdf]

## **Supplemental Information**

Supplemental Experimental Procedures

Supplemental Data

Figure S1, related to Figure 1

Figure S2, related to Figure 2

Figure S3, related Figure 3

Figure S4, related Figure 4

Tables S1, related to Figure 3

Supplemental References

## Supplemental Experimental Procedures

### Algorithms tested with ExCoR

An algorithm describes an approach to optimization of the model, which would include here real space refinement, automated fixing of rotamers, as well as peptide and NQH flips. The form of the model includes the actual structure, and variable parameters that describe it, which here include TLS modeling of ADPs. Additionally different restraints can be applied during the refinement, in this case NCS restraints on coordinates and/or B-factors.

**Real space refinement:** refinement of coordinate positions against the real space electron density maps.

**Non-crystallographic symmetry (NCS) restraints:** NCS refers to more than one copy of a molecule in the asymmetric unit of the crystal (i.e. the fundamental irreducible unit of the crystal). The global NCS restraint method used here involves a coordinate superposition of the related models followed by the calculation of the average model, and subsequent restraint of each model to that average. The superposition and averaging is repeated at each cycle of model optimization. The effect of these restraints is to make the copies of the molecules similar. This decreases the effective number of parameters refined and can improve model quality in some cases.

**Fix rotamers:** Protein side chains have sets of most common rotamers. This algorithm identifies side chains that are either rotamer outliers as defined by the Richardson rotamer library (Lovell et al., 2000) or are side chains with poor fit to the experimental electron density maps. For each side chain that is corrected, the method rotates each torsion angle moving out from the backbone looking for the best real-space fit to the density. The maps are not calculated after each rotamer correction, but instead are recalculated after all flagged rotamers have gone through the correction protocol once. Each correction is then validated against the recalculated maps, and those side-chains that are not an improvement over the original orientation are returned to the original orientation. This whole process is considered a macrocycle, and the user may specify the number of macrocycles for rotamer correction.

**Flip peptides:** Rotates the peptide backbone by 180 degrees to best fit the model to the electron density maps.

**NQH flips:** Asn, Gln, and His residues can often be fit favorably to the data in two orientations, related by a 180° rotation. In many cases, however, only one of these orientations is sterically and electrostatically favorable. *Phenix.refine* uses *Reduce* (Word et al., 1999) to identify Asn, Gln, and His residues that should be flipped, and then flips them automatically.

**Translation, Libration (or rotation), Screw refinement (TLS):** This is a method of refining the ADPs that considers the coordinated motion of groups of atoms, which thus uses less parameters than individual ADP refinement. The TLS formalism is a constrained anisotropic ADP refinement. TLS refers to three types of motion that can be

used to describe a displacement. A secondary structural element or an entire domain could define a group. For example, a protein can be partitioned into different numbers of groups. Both the borders for the groups and the number of groups can have a significant impact on the effectiveness of the TLS refinement. In this work we compared two approaches, *TLSMD*, and *phenix.find\_tls\_groups*. *TLSMD* allows the user to specify the number of TLS groups, from 1-20. The approach incorporated into PHENIX yields a single answer for partitioning the protein into TLS groupings.

## Supplemental Data

### Figure S1, related to Figure 1

(A) Plots of  $R_{\text{free}}$  with RMSD bonds or angles or  $R_{\text{work}}$ . For each structure the indicated results of the 256 ExCoRs are plotted. The red circles represent the 10% of the ExCoRs with the lowest  $R_{\text{free}}$  (e.g. 25/256). The dashed black lines represent the starting values for the PSI structures, or the values from the control refinement for the ER structures.

(B) Plots of  $R_{\text{free}}$  versus Mol Probit clash score. For each structure, the indicated results of the 256 ExCoRs are plotted. The dashed red lines represent starting values obtained from the deposited PSI model.

(C) Plots of  $R_{\text{free}}$  versus percent of residues with some weak density. For each structure, the indicated results of the 256 ExCoRs are plotted. The dashed red lines represent starting values obtained from the deposited PSI model.

(D) Automated vs manual rebuilding with ExCoR. We solved five different ligand-bound ER LBD structures using PHENIX AutoMR, followed by PHENIX Autobuild. The structures were then manually inspected and rebuilt in Coot, followed by ligand docking and ExCoR. These were compared with structures that went straight into ExCoR with only ligand docking, and no manual rebuilding. For each set of 256 ExCoRs, the  $R_{\text{free}}$  was plotted against the RMSD of bond lengths or angles.

(E) ExCoR error distribution and statistical analysis. Obtaining models with decreased  $R_{\text{free}}$  is not due to noise in the refinement procedure. The  $R_{\text{free}}$  from ExCoR refinement is shown as a frequency distribution, with black bars representing the bins. The green line indicates the starting  $R_{\text{free}}$  from the deposited pdb. The red line shows the frequency distribution of the noise for refinement of each structure, using the outlined procedure. Briefly,  $R_{\text{free}}$  was removed, and two new test sets were assigned. Both new data sets were subject to 256 ExCoR refinements, the difference between the resulting  $R_{\text{free}}$  was computed, and plotted here as the noise. The noise distribution was centered on the control refinement  $R_{\text{free}}$ . Note that the non-Gaussian distribution of the data derives from the strong effects of NCS or TLS in some cases. These data demonstrate that ExCoR results can be distinguished from noise, as long as  $R_{\text{free}}$  improves by more than approximately 1% (e.g. 3OI7), which is largely the case.

(F) For the 35 PDB models (listed in table S1A) from PSI labs, the  $R_{\text{free}}$  range of ExCoR (signal) was compared to the  $R_{\text{free}}$  range obtained after control refinement of each structure using two new  $R_{\text{free}}$  sets (noise).

(G) Effect of changing  $R_{\text{free}}$  flags on the effectiveness of refinement strategies.  $R_{\text{free}}$  of models obtained from ExCoR of the indicated PDB structures using a set of  $R_{\text{free}}$  flags were plotted in decreasing order (black).  $R_{\text{free}}$  obtained from the same strategies using a different set of  $R_{\text{free}}$  flags are shown (red) for comparison.

(H) Correlation between  $R_{\text{free}}$  obtained from ExCoR using two different  $R_{\text{free}}$  flags.  $R_{\text{free}}$  obtained upon ExCoR of the indicated PDB structures using one set of  $R_{\text{free}}$  flags was

plotted against those obtained with the same strategies but using a different set of  $R_{\text{free}}$  flags. The correlation coefficient,  $R^2$  is indicated.

(I)  $R_{\text{sleep}}$  versus  $R_{\text{free}}$  – For the indicated structures, the  $R_{\text{free}}$  reflections were removed completely from the data set and set aside as the  $R_{\text{sleep}}$  test set, and then a new  $R_{\text{free}}$  test set was selected and used for ExCoR. For each of the 256 new models obtained per structure,  $R_{\text{sleep}}$  was calculated using the removed  $R_{\text{sleep}}$  test set, and compared to the  $R_{\text{free}}$  obtained using the new test set.

(J) Effective strategies selected using a set of  $R_{\text{free}}$  flags are also effective using a different set of  $R_{\text{free}}$  flags. ExCoR strategies leading to the lowest  $R_{\text{free}}$  models were selected using a set of  $R_{\text{free}}$  flags #1, and compared to corresponding starting and control models using a different set of  $R_{\text{free}}$  flags #2.

**A** ER: Lowest Rfree  $\approx$  lowest RMSD bonds or angles

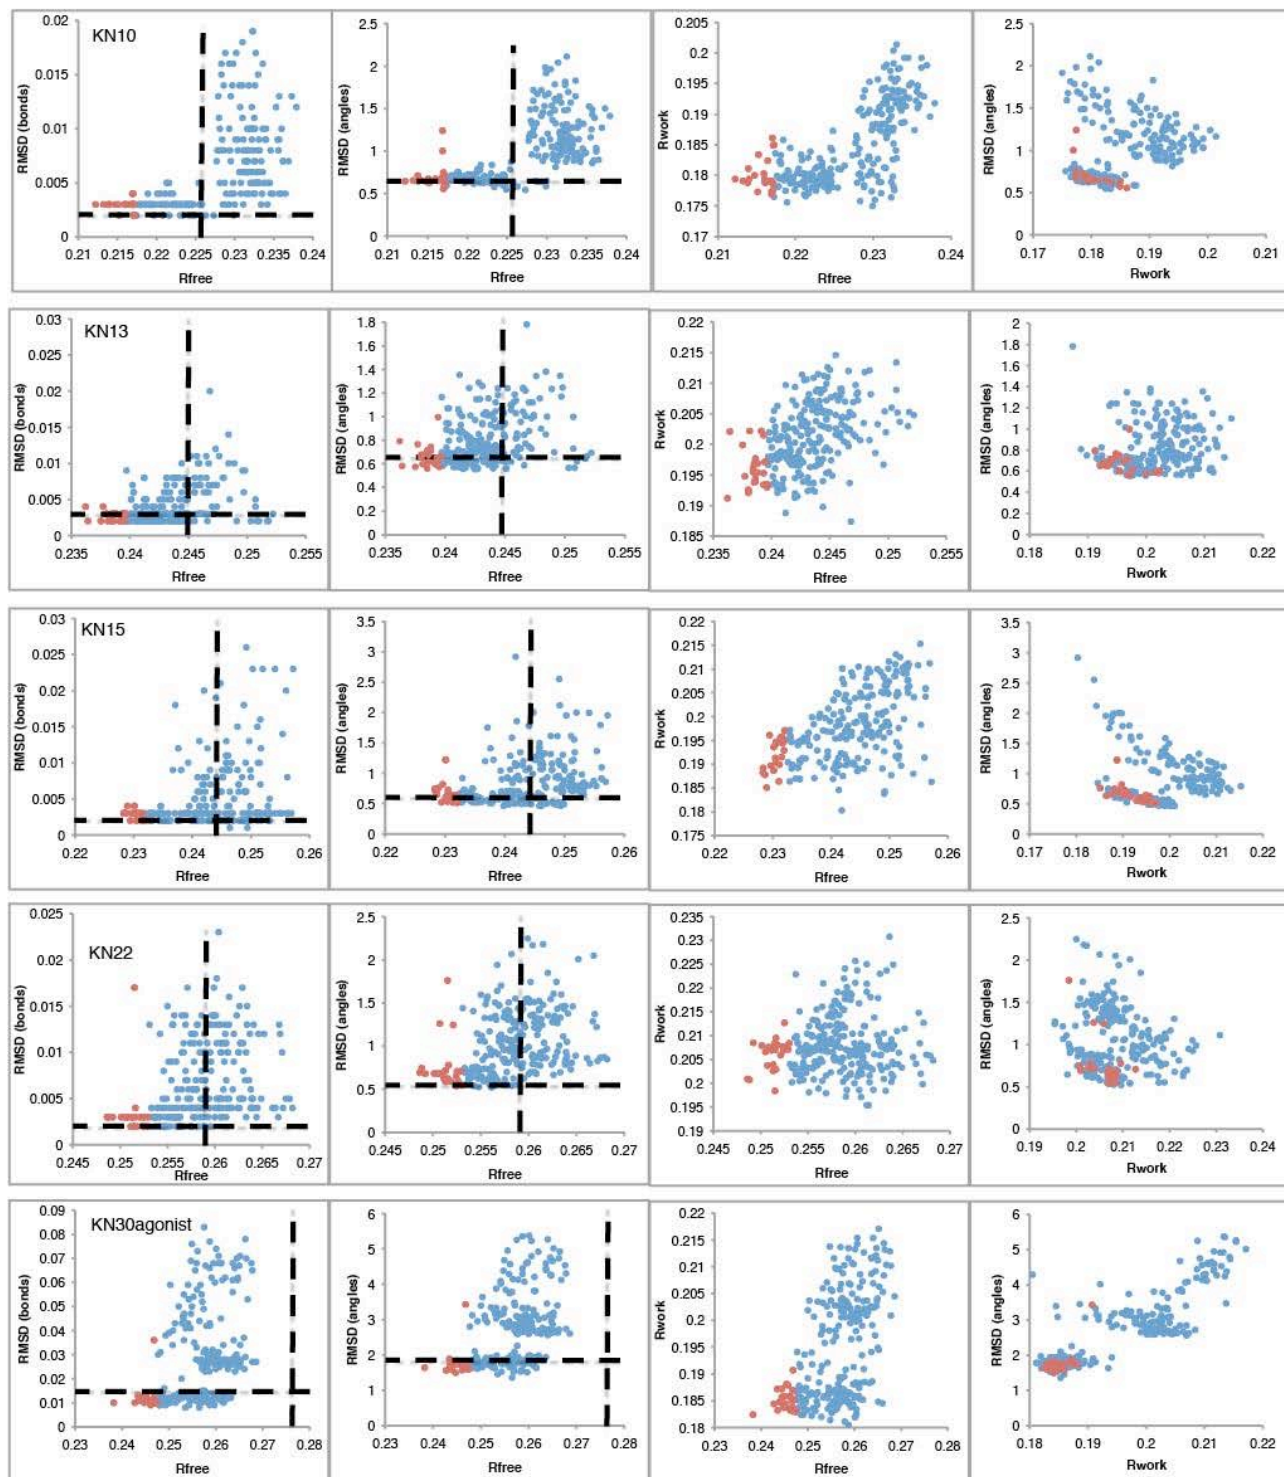

**Fig. S1A-1**

ER: Lowest Rfree  $\approx$  lowest RMSD bonds or angles

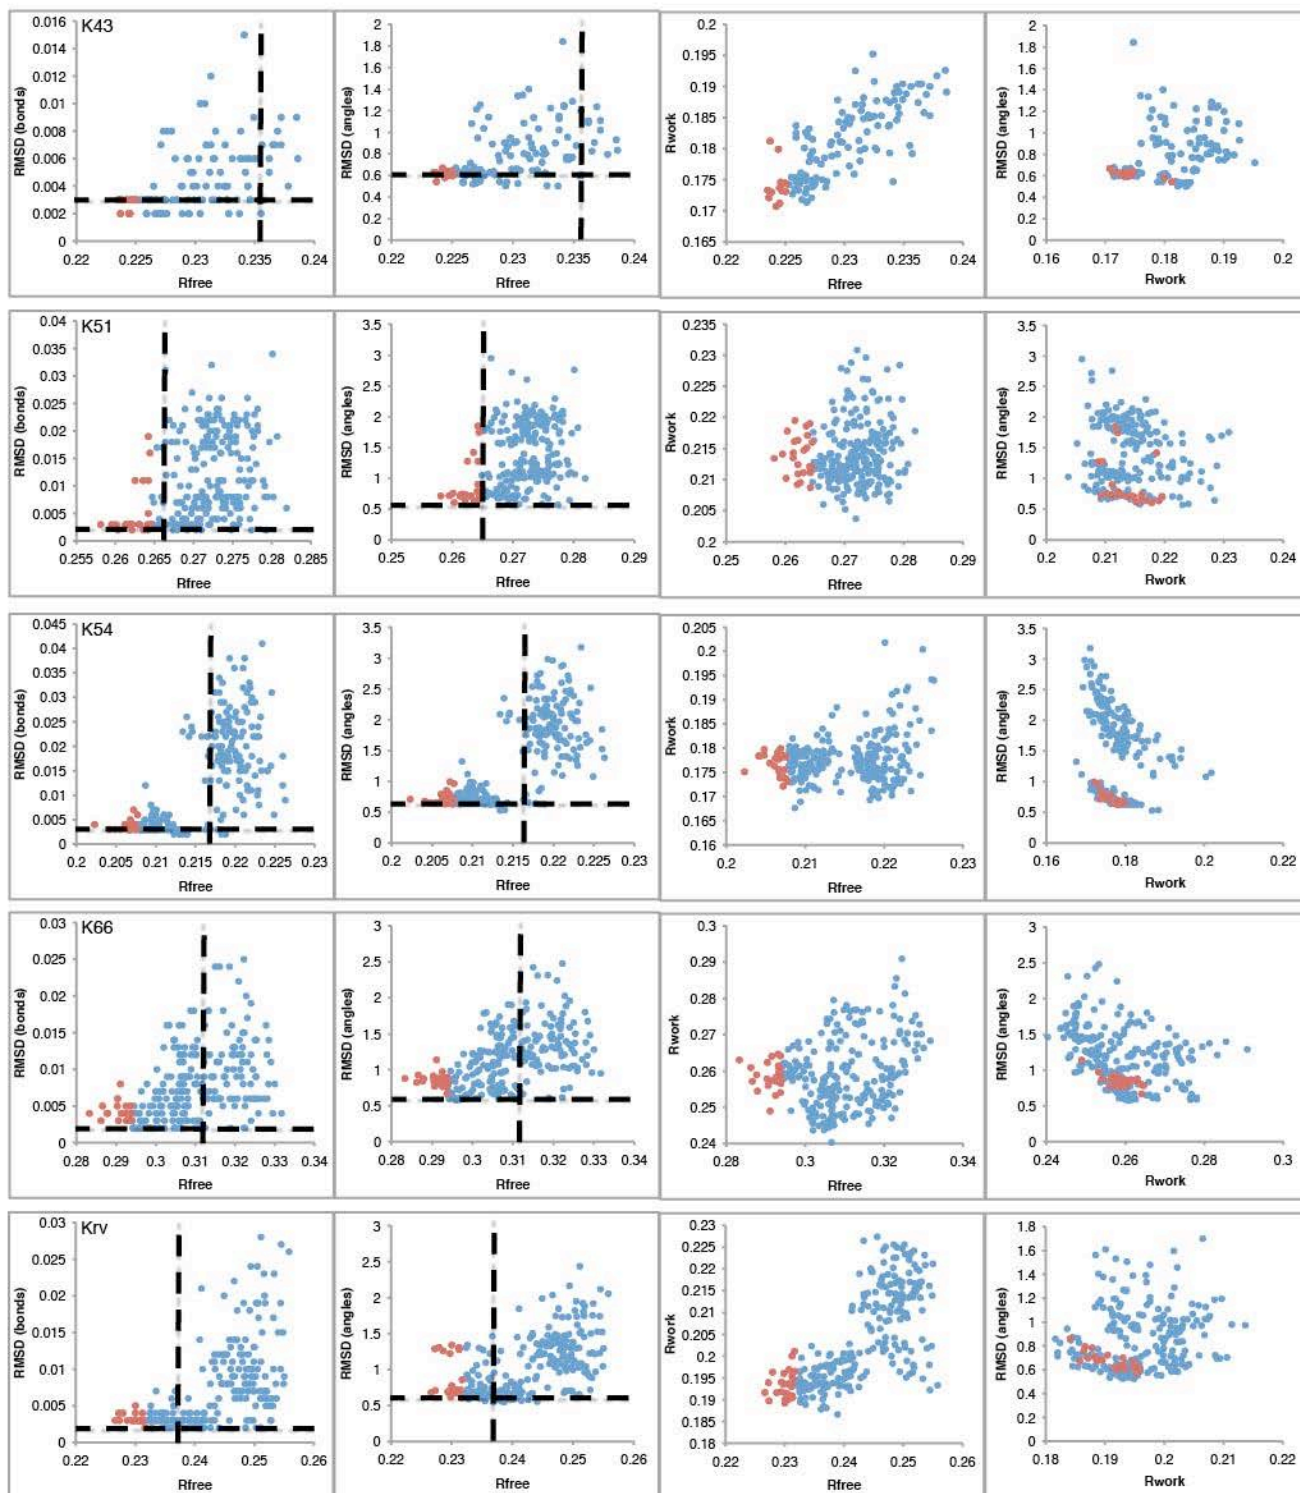

Fig. S1A-2

ER: Lowest Rfree  $\neq$  lowest RMSD bonds or angles

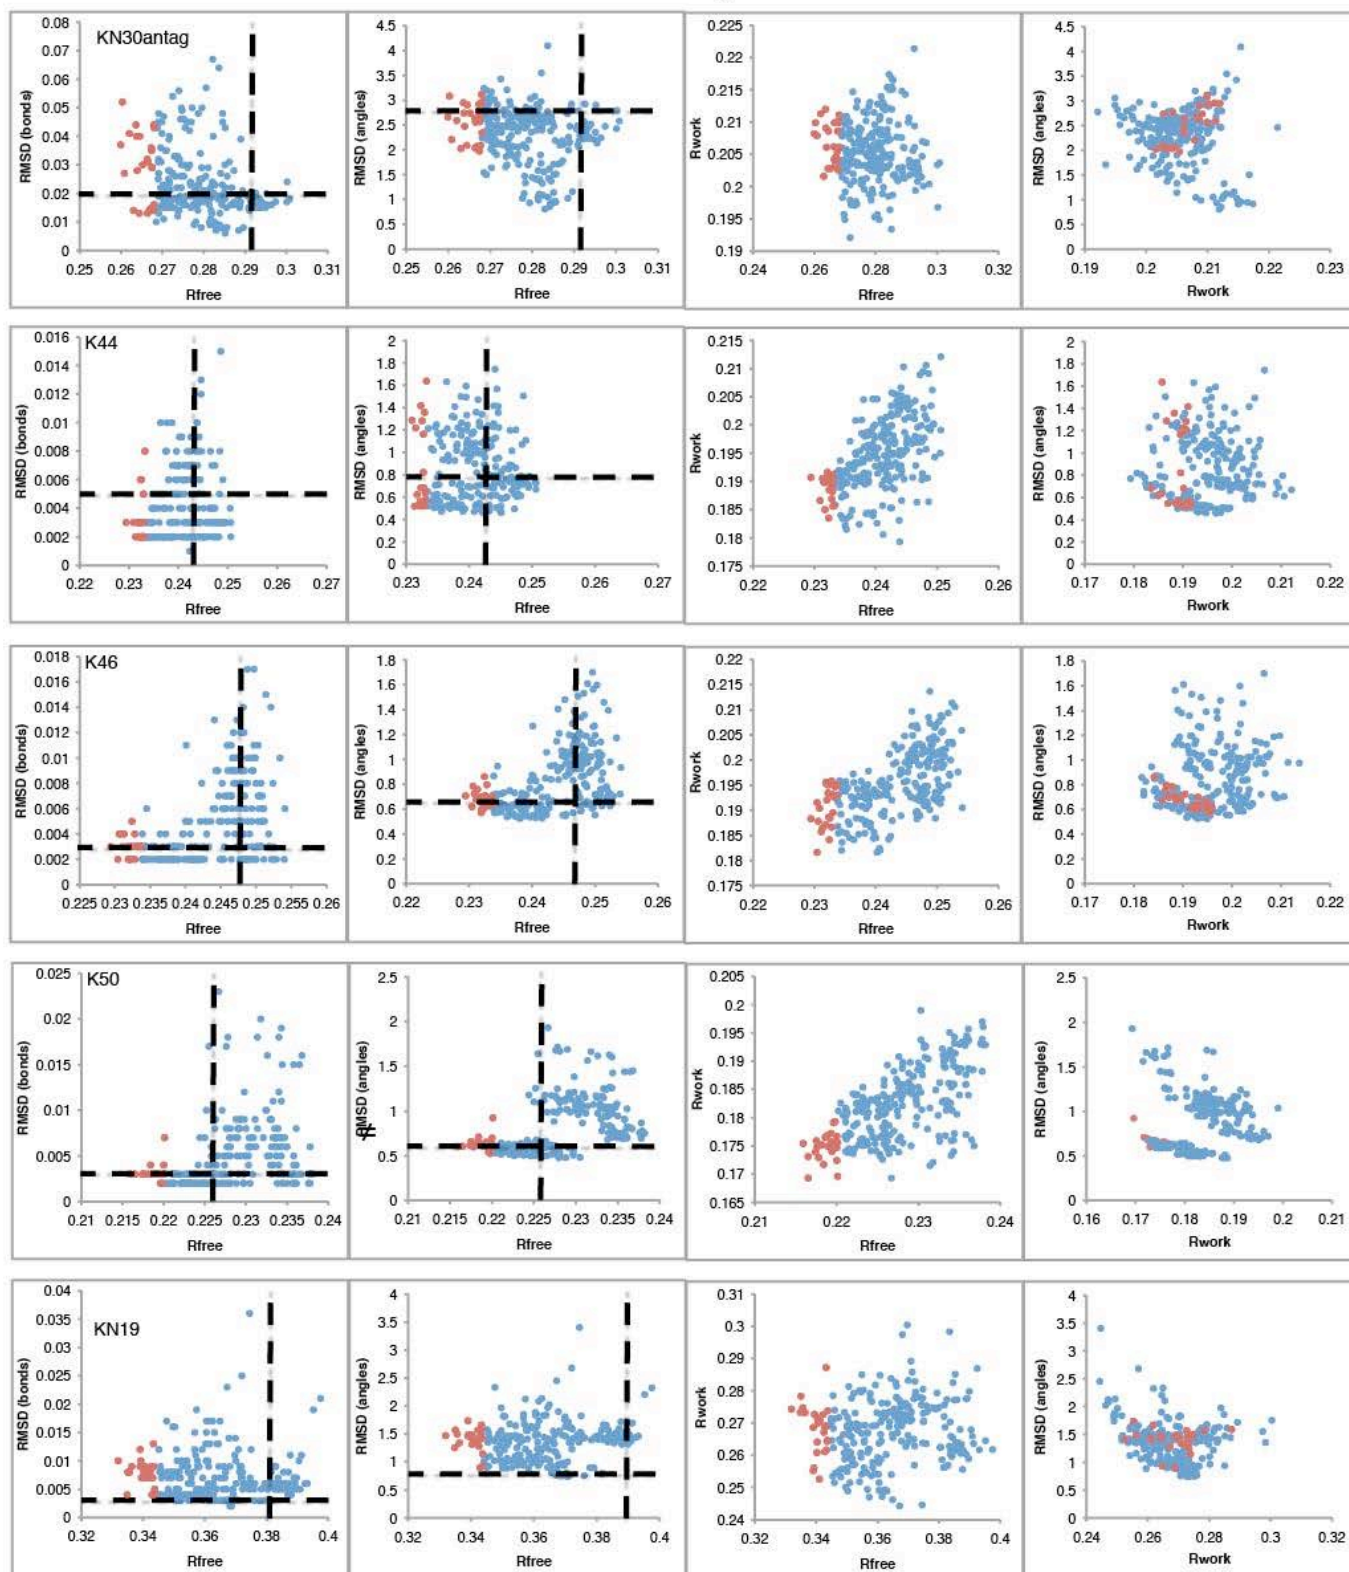

Fig. S1A-3



ER: Lowest Rfree  $\neq$  lowest RMSD bonds or angles

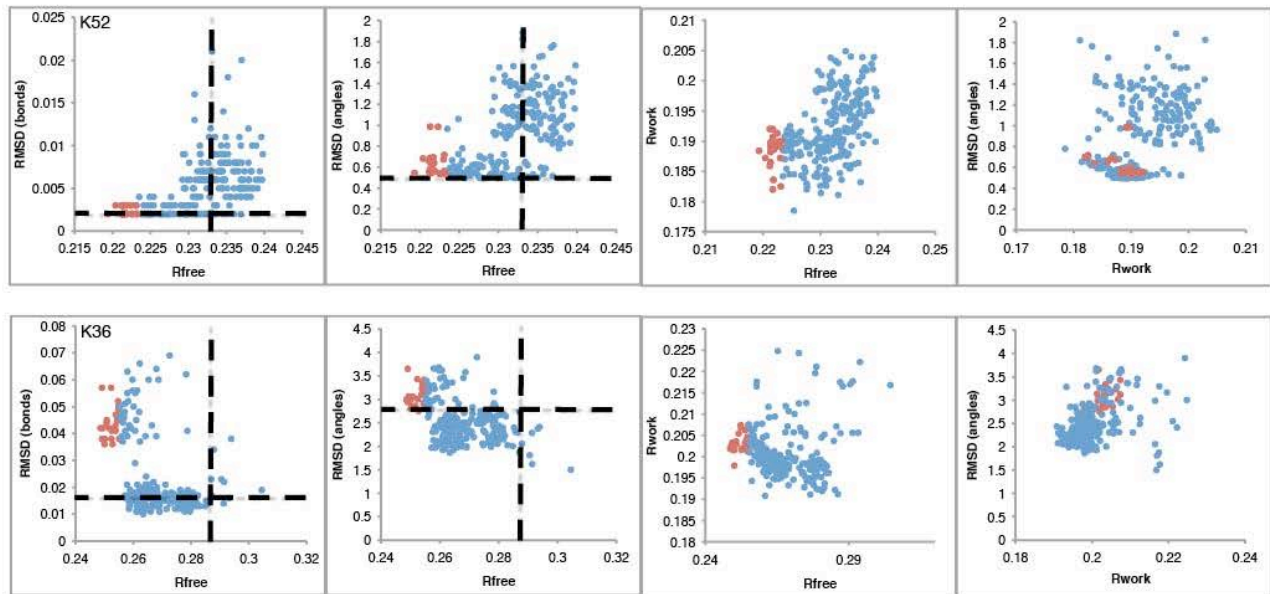

**Fig. S1A-4**

PSI: Lowest Rfree  $\approx$  lowest RMSD bonds or angles

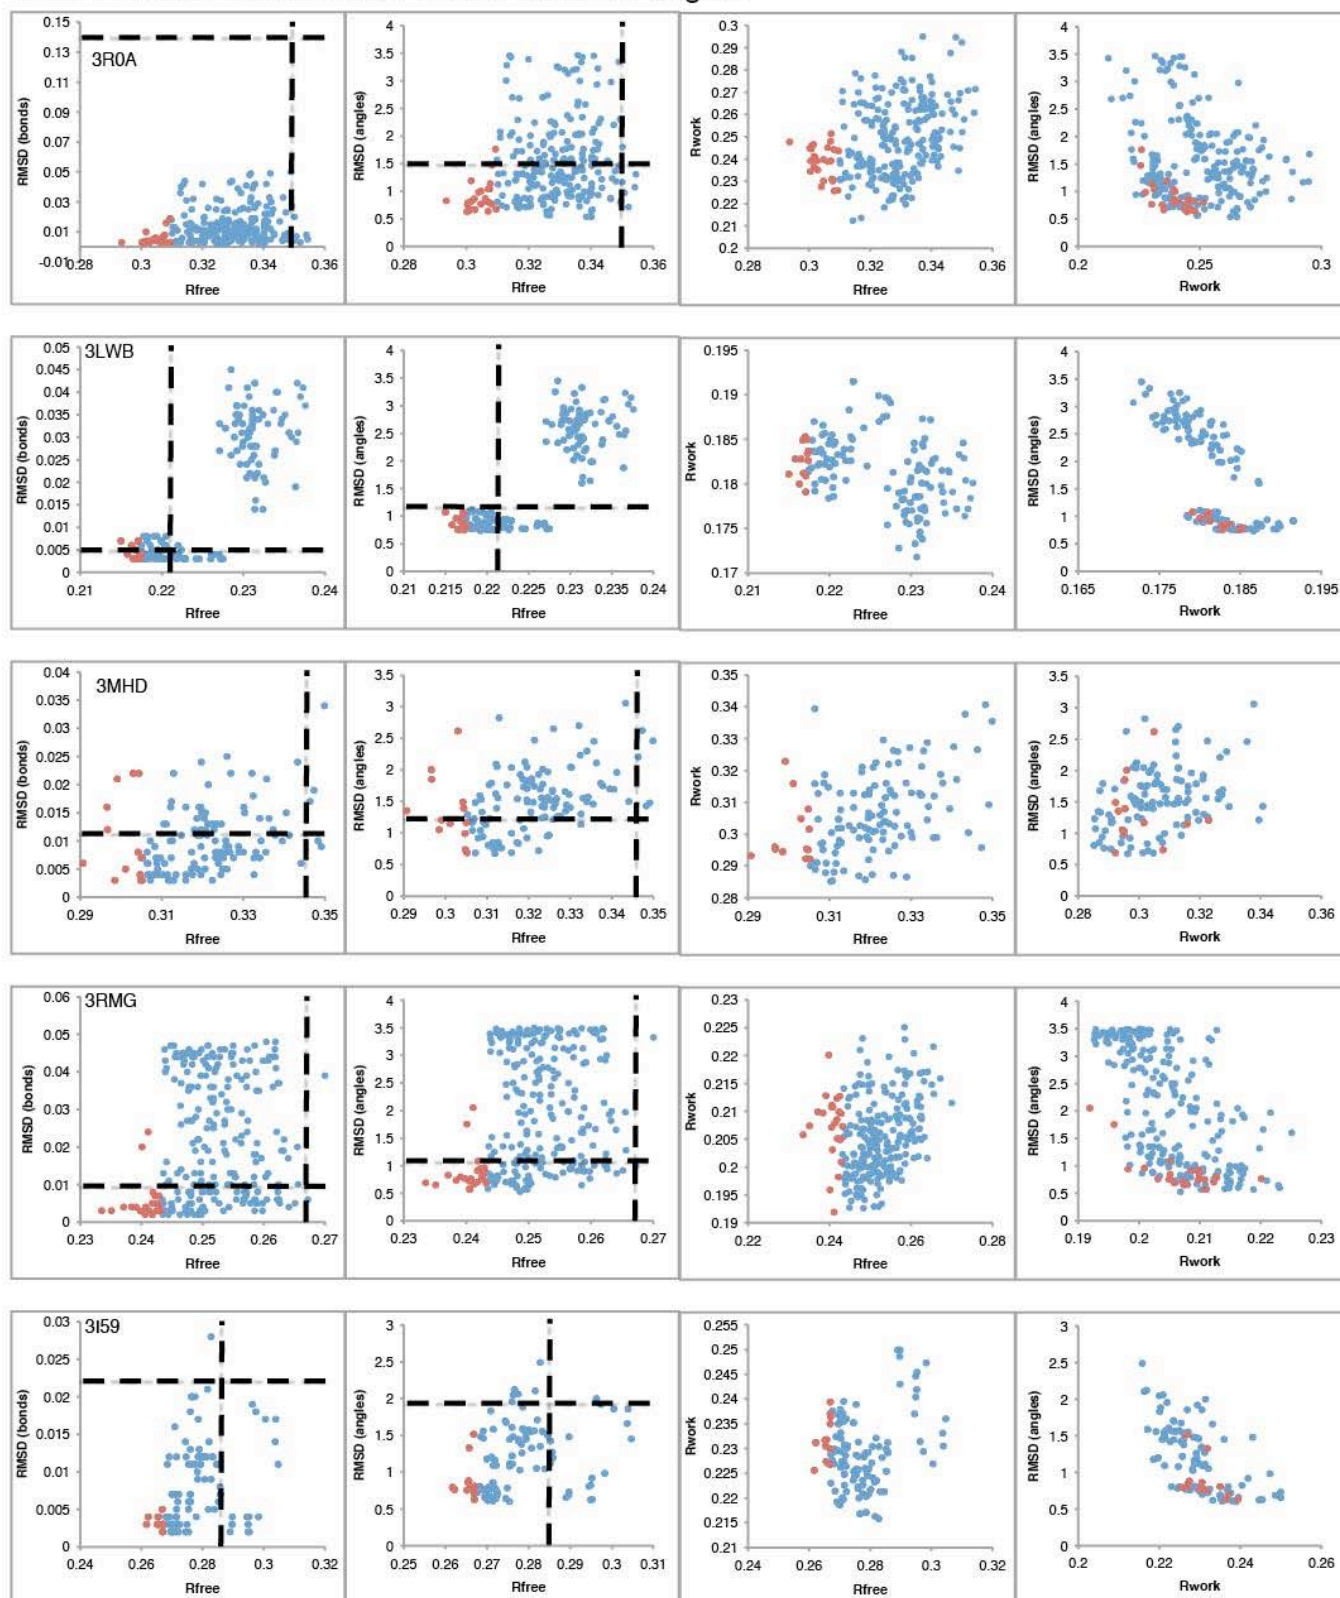

Fig. S1A-5

PSI: Lowest Rfree  $\approx$  lowest RMSD bonds or angles

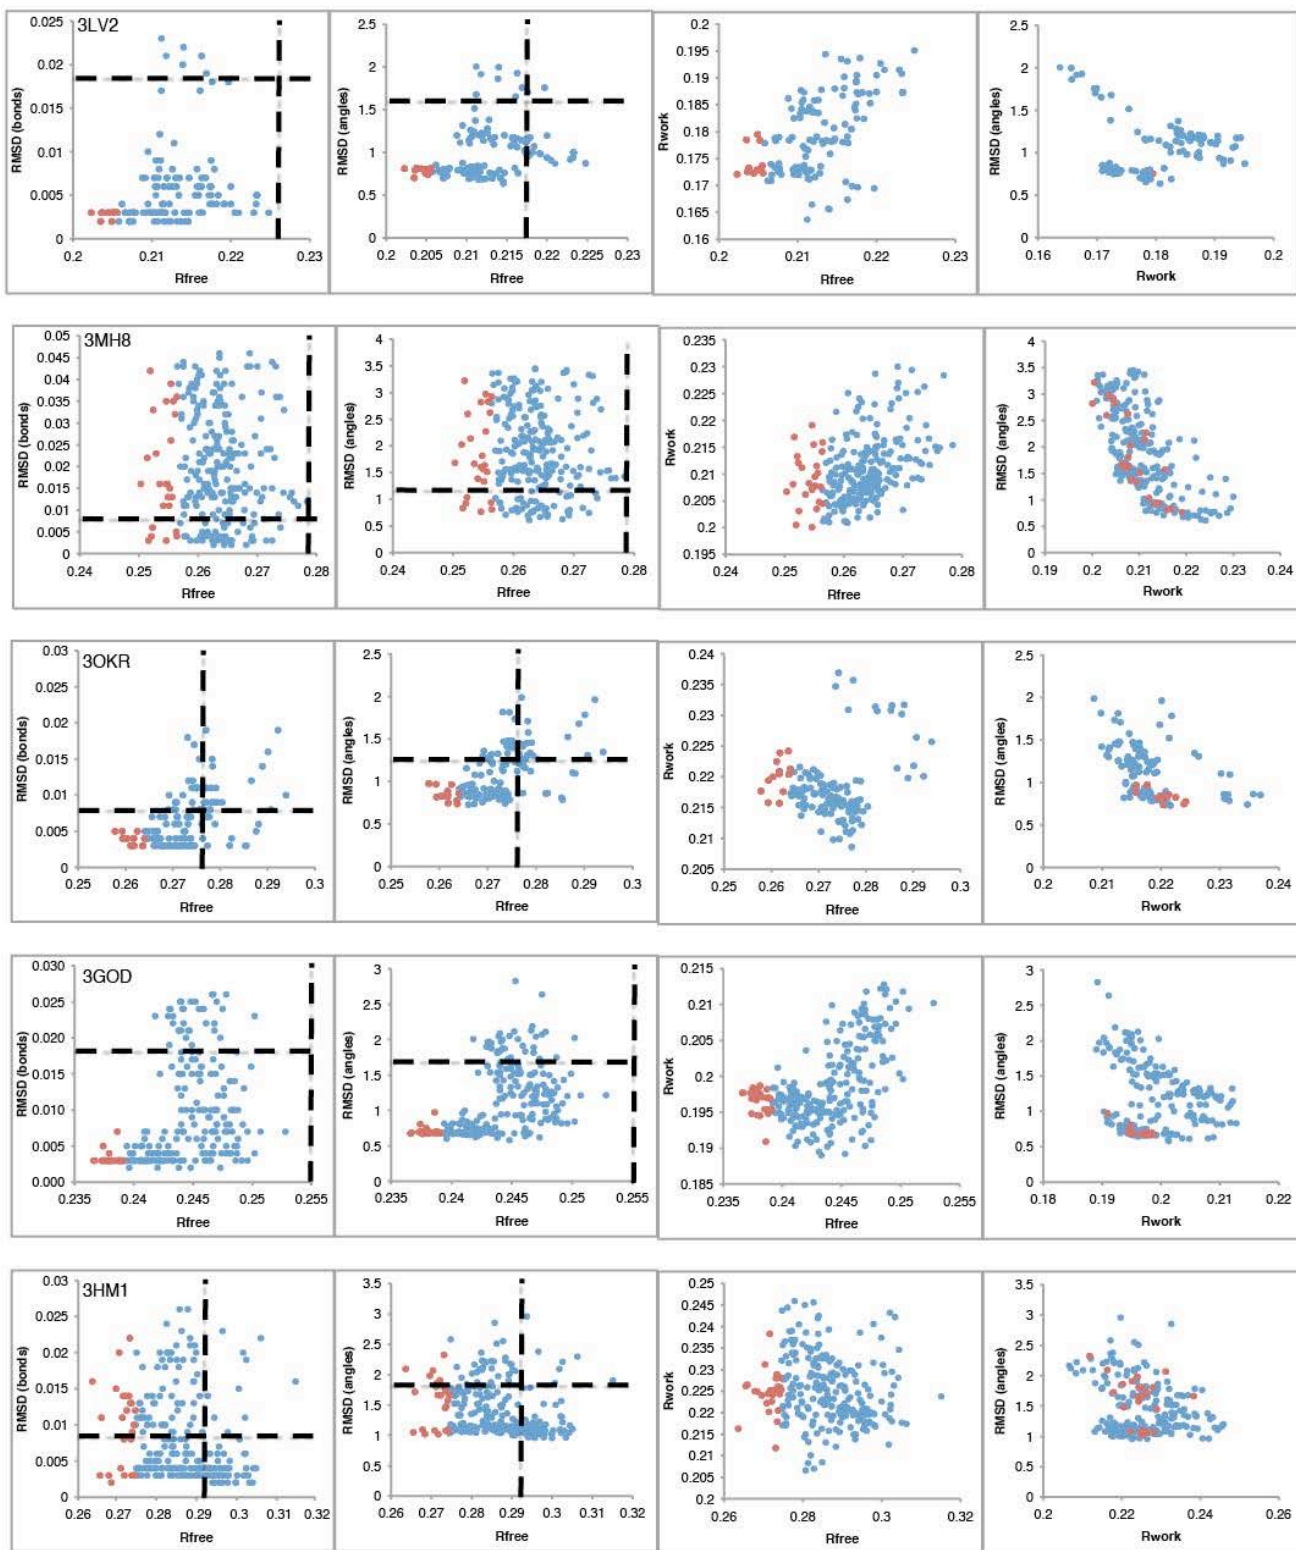

Fig. S1A-6

PSI: Lowest Rfree  $\approx$  lowest RMSD bonds or angles

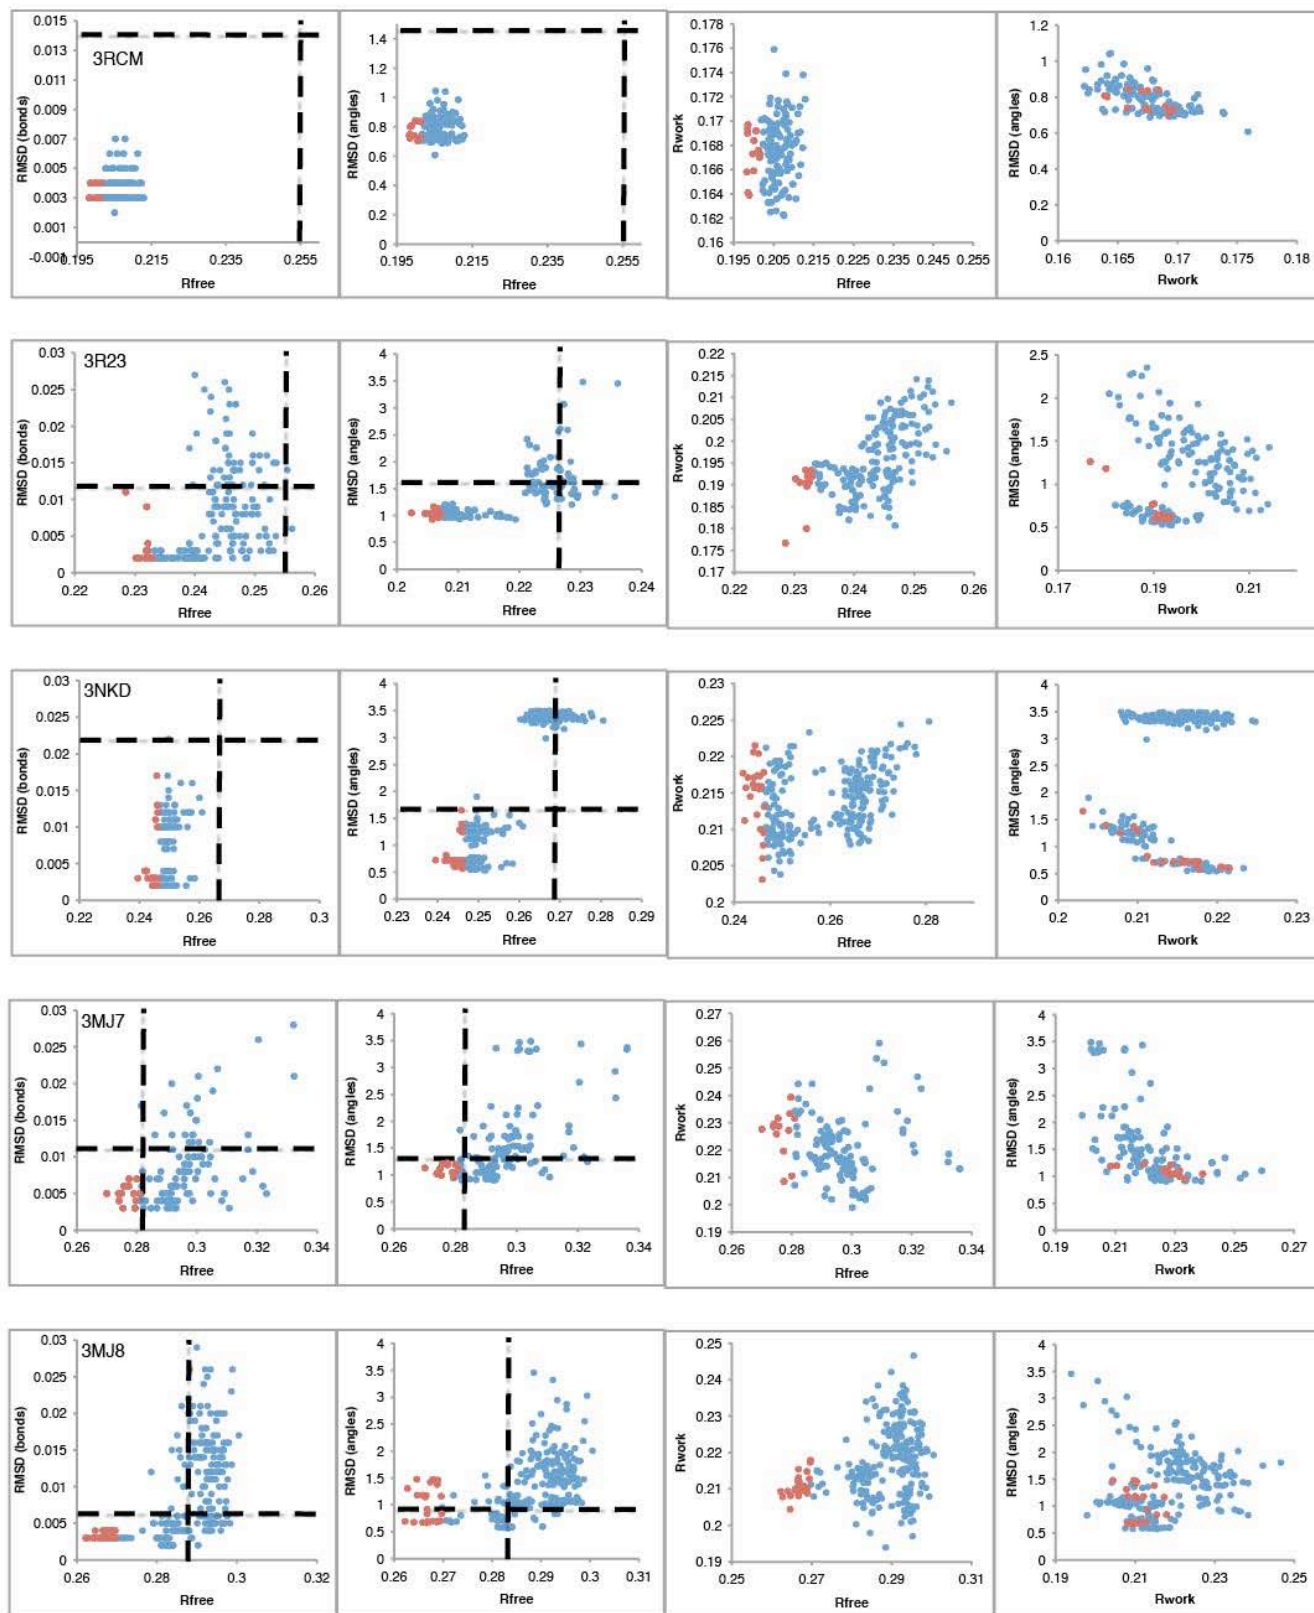

Fig. S1A-7

PSI: Lowest Rfree  $\approx$  lowest RMSD bonds or angles

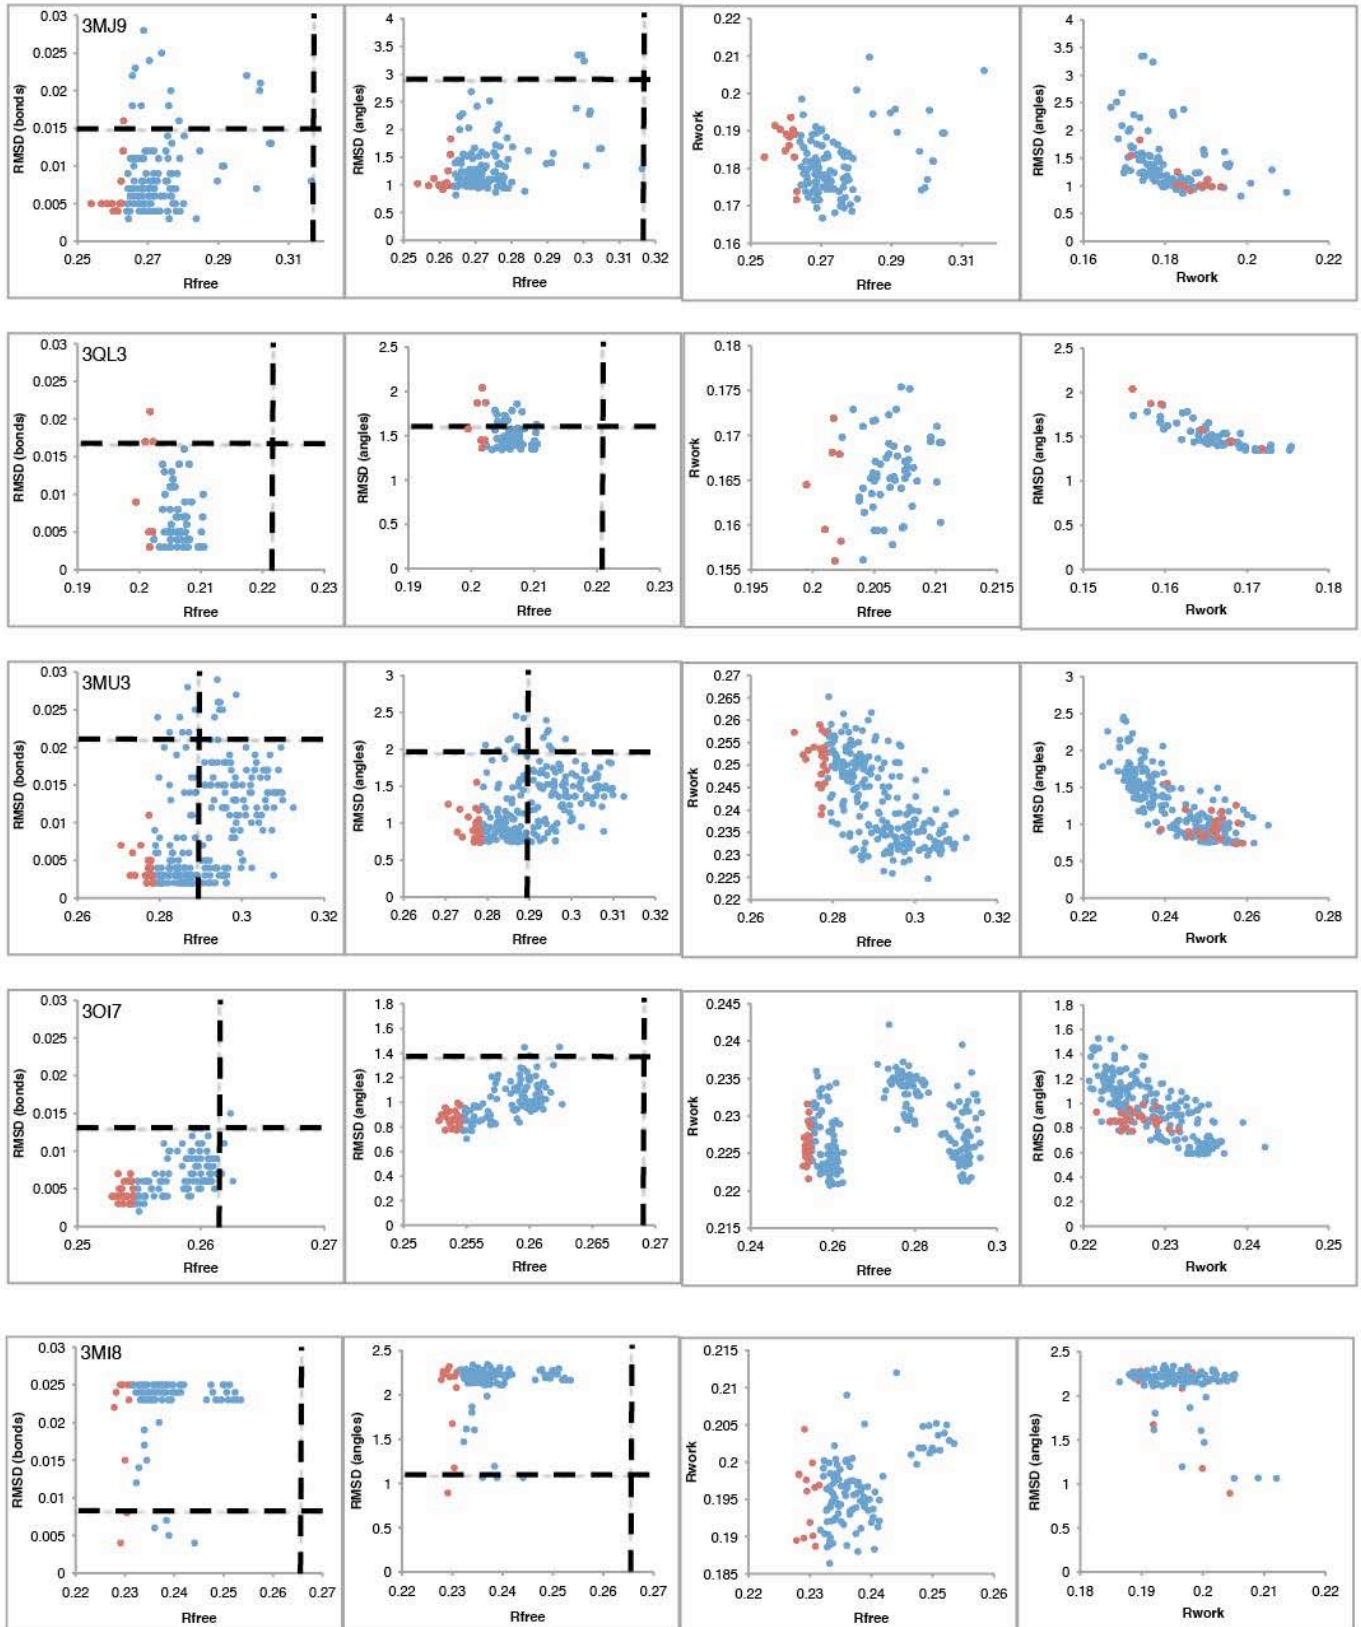

Fig. S1A-8

PSI: Lowest Rfree  $\neq$  lowest RMSD bonds or angles

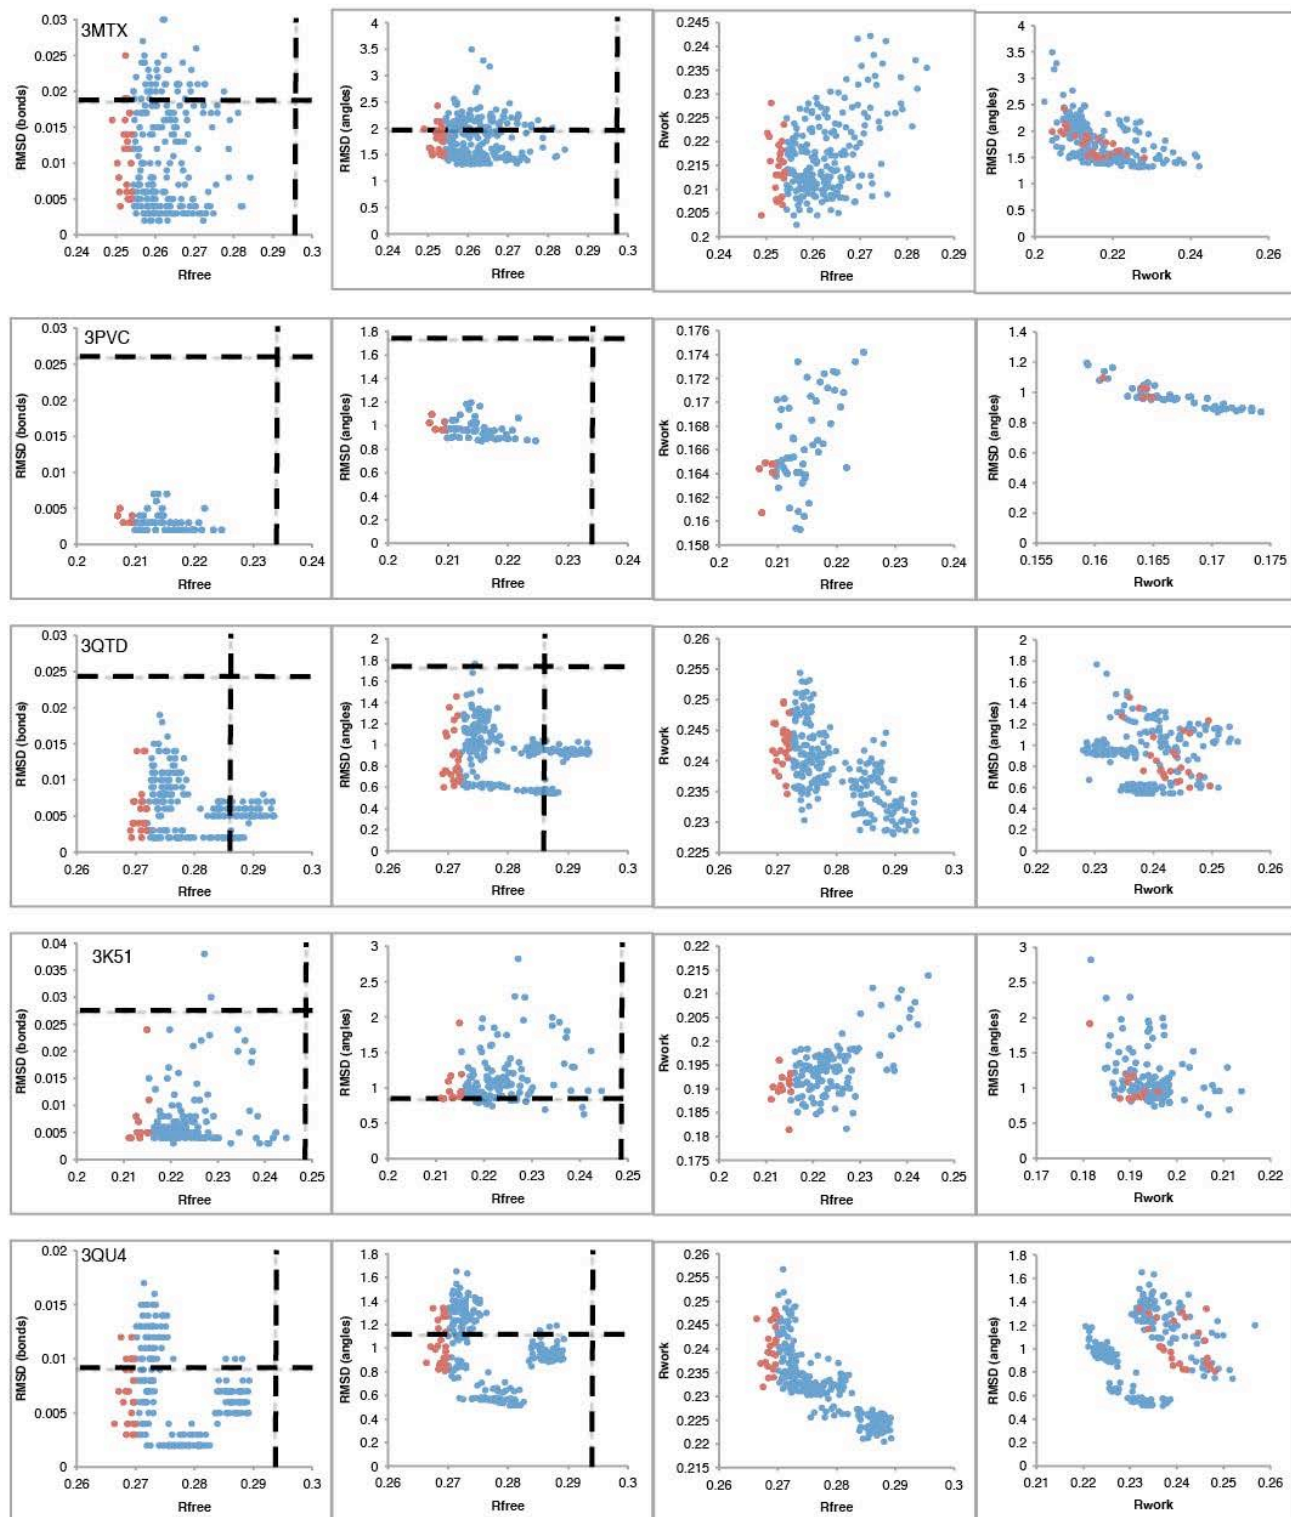

Fig. S1A-9

PSI: Lowest Rfree  $\neq$  lowest RMSD bonds or angles

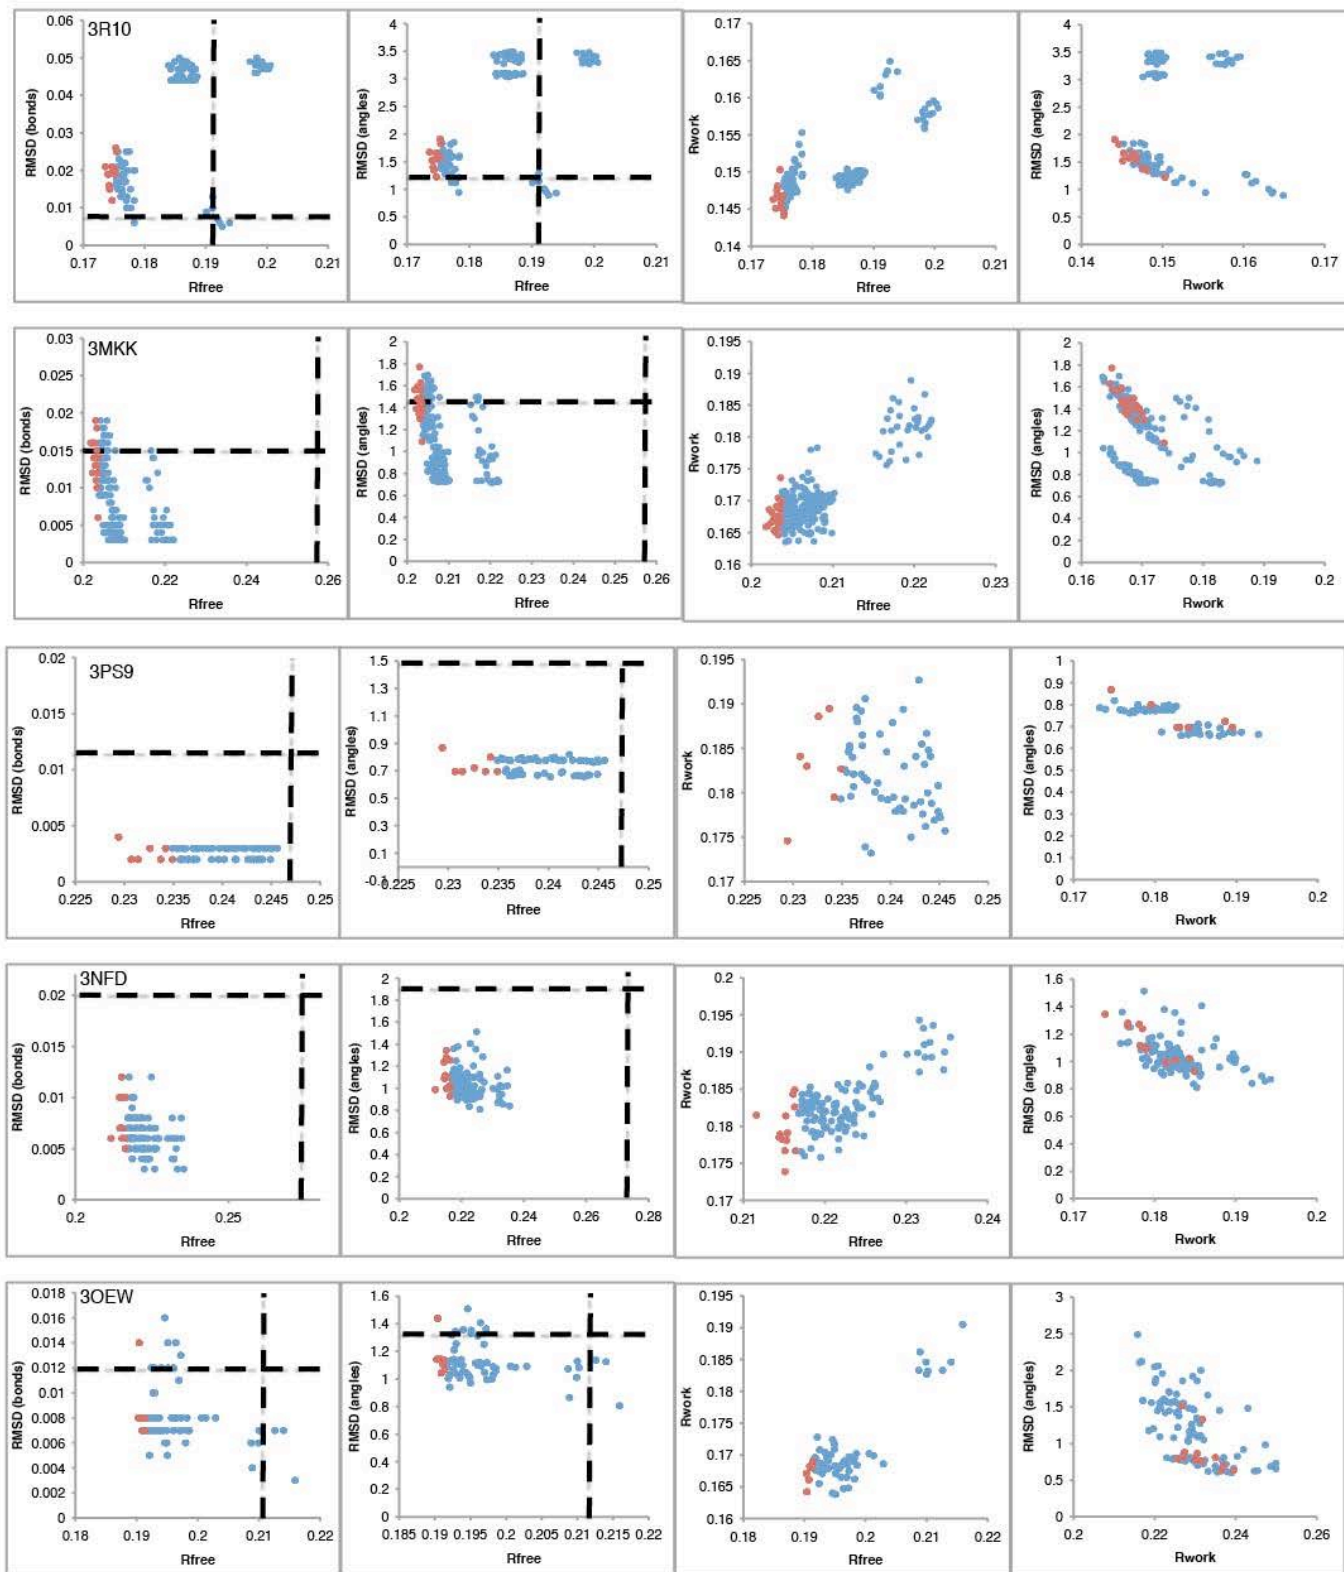

Fig. S1A-10

PSI: Lowest Rfree  $\neq$  lowest RMSD bonds or angles

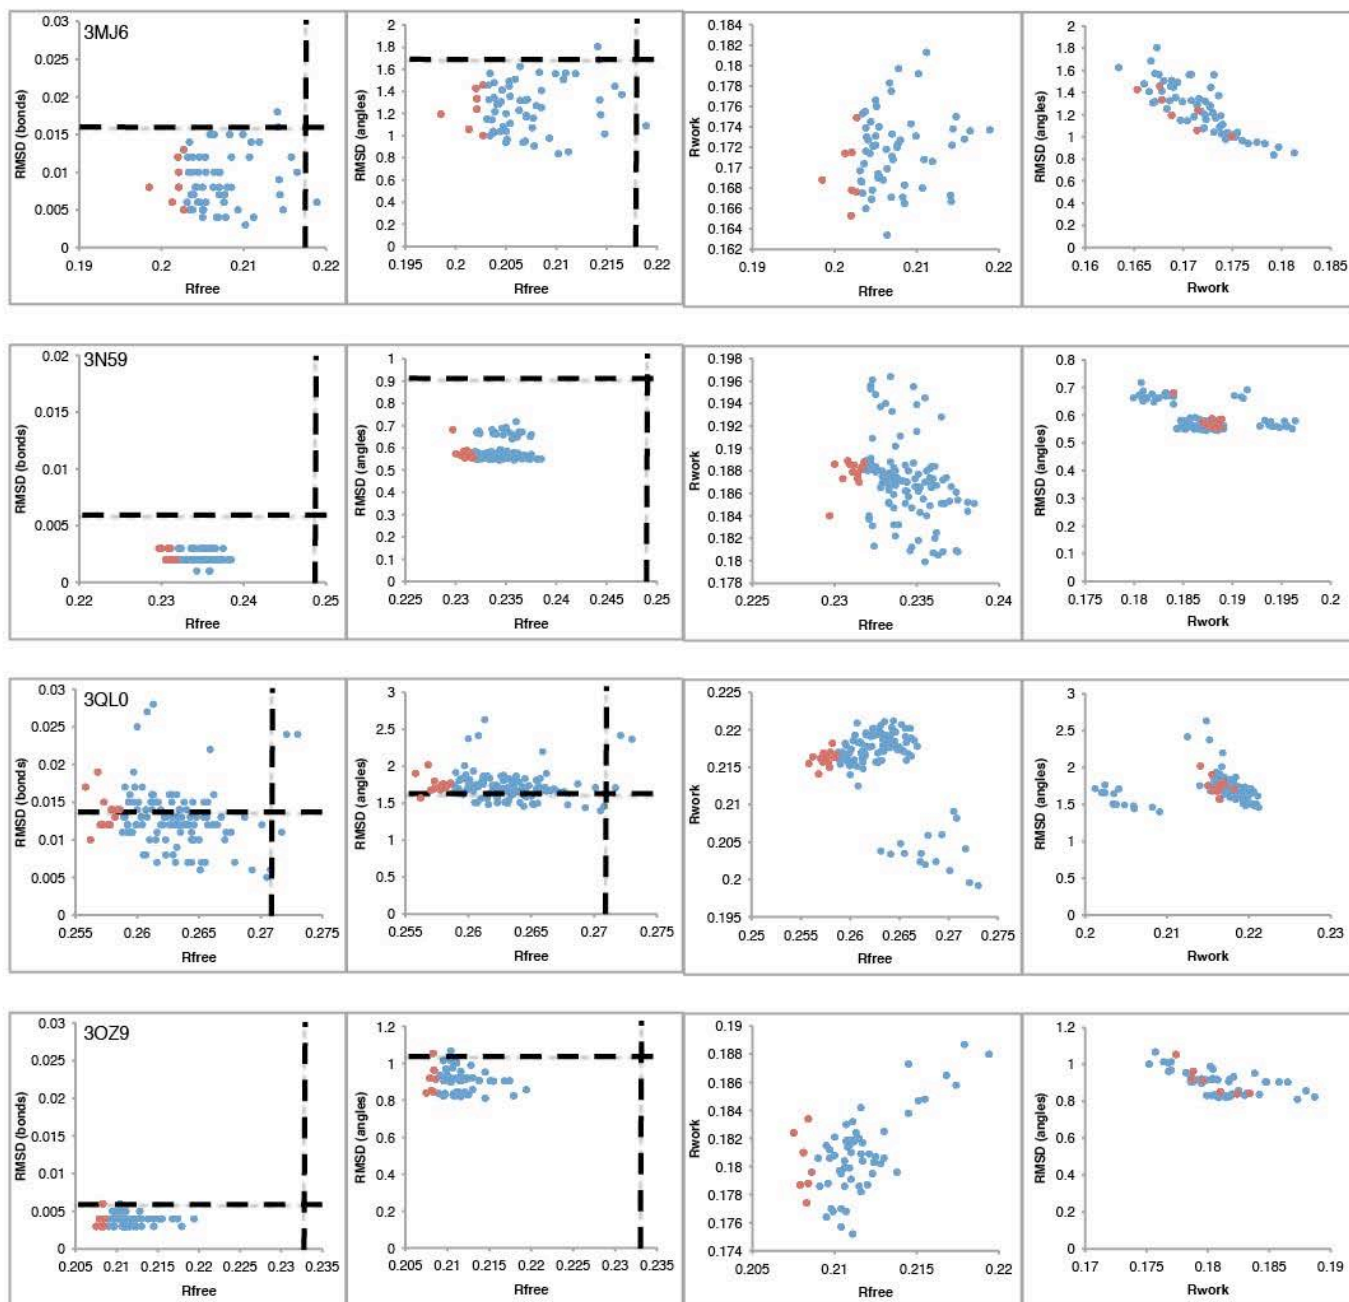

Fig. S1A-11



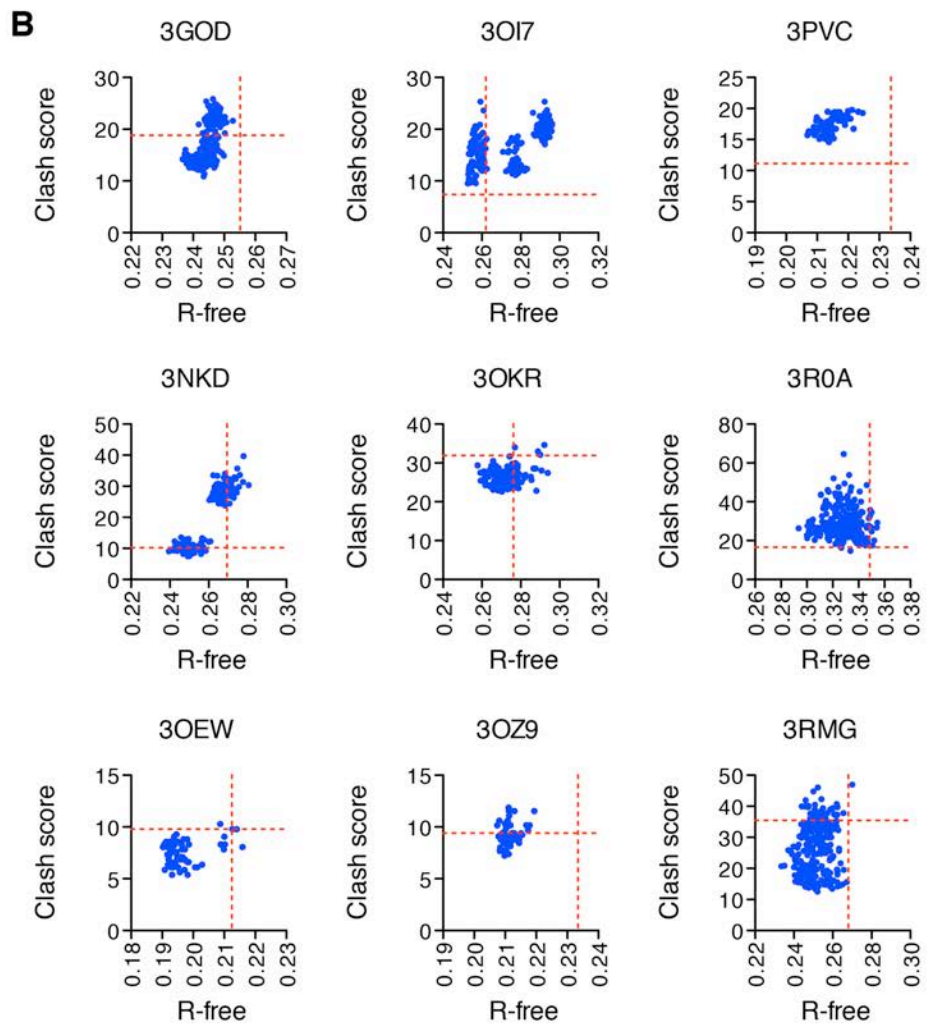

**Fig. S1B**

**C**

Percent of residues with some weak density

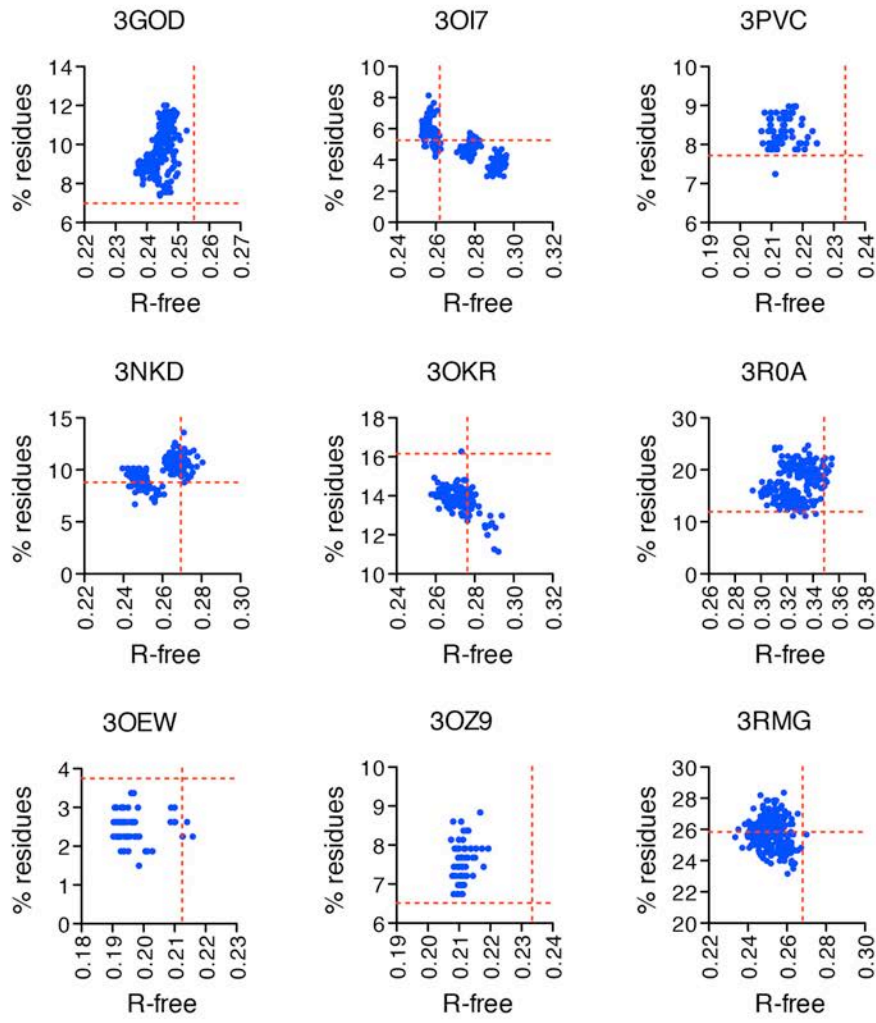**Fig. S1C**

**D** ● ExCoR (Automated) ● Manual rebuilding + ExCoR

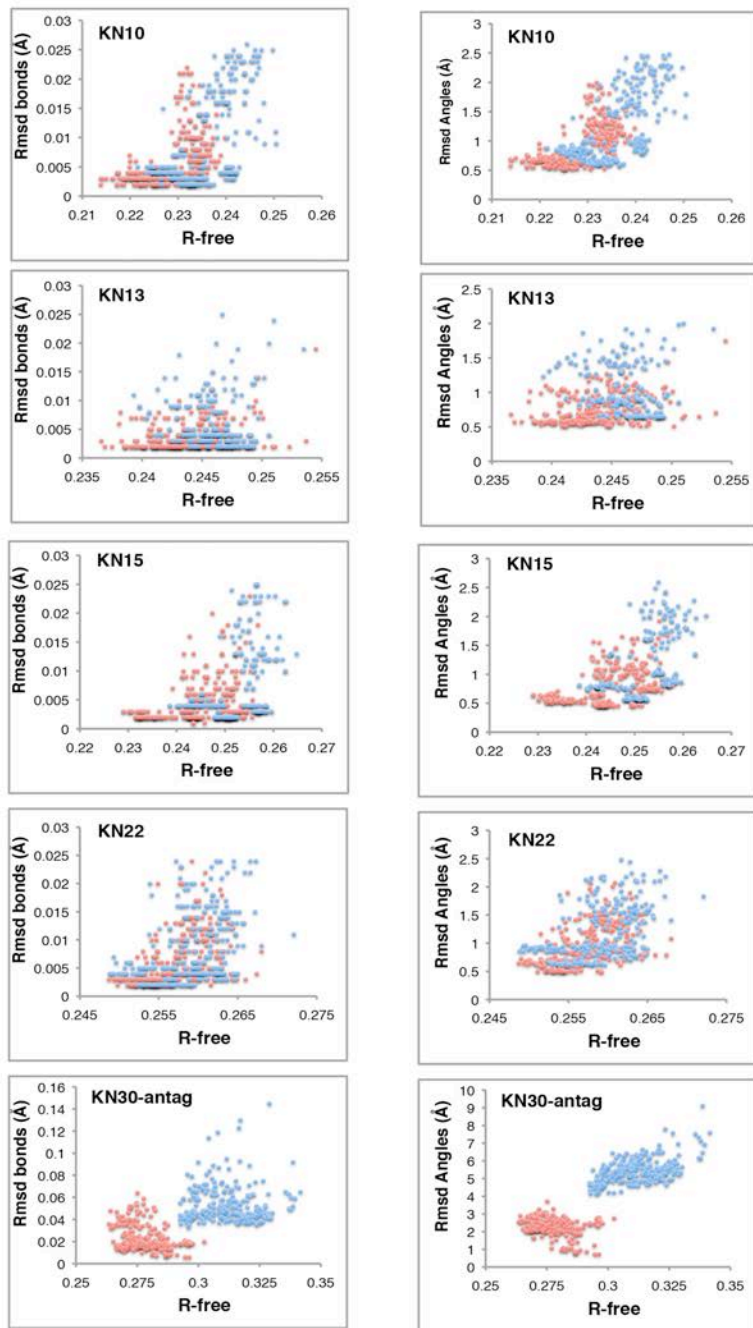

**Fig. S1D**



**G**

— Rfree flags #1  
— Rfree flags #2

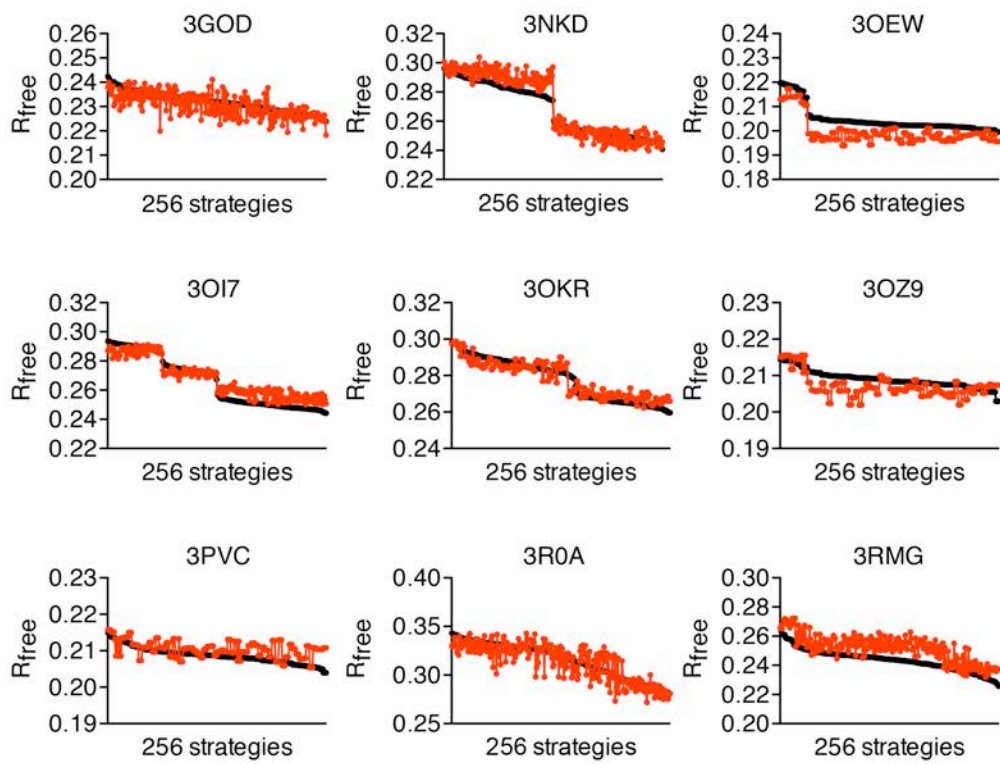**Fig. S1G**

**H**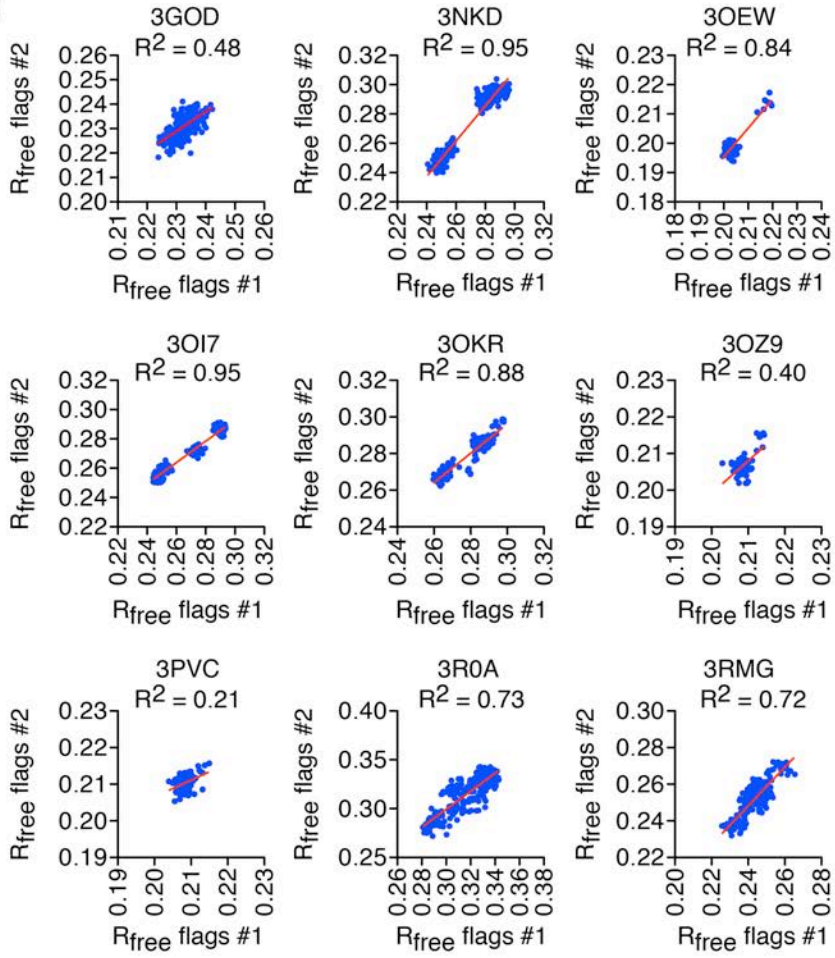**Fig. S1H**

I

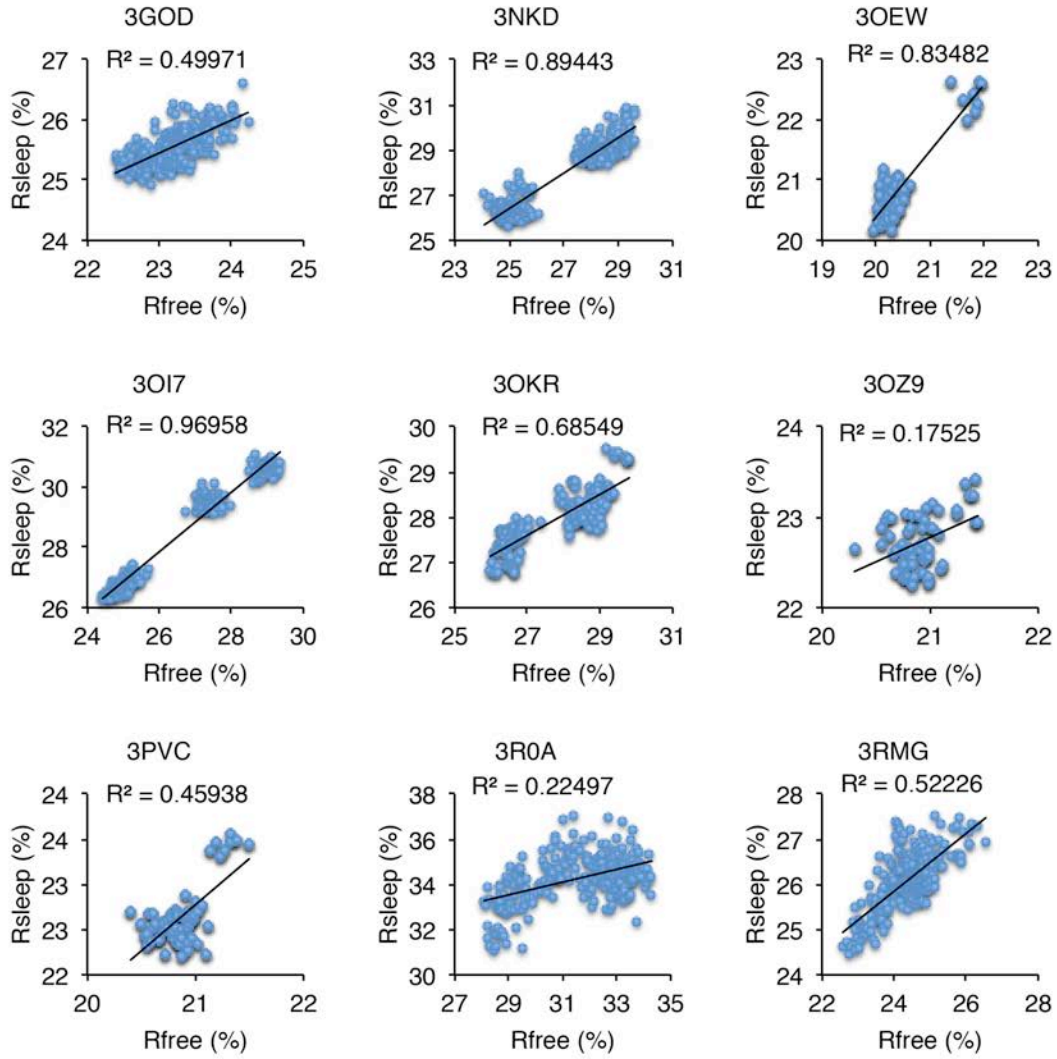

**Fig. S1I**

J

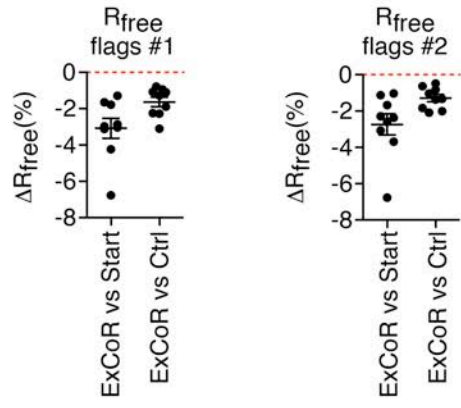

Fig. S1J



## Figure S2, related to Figure 2

Structural diversity, error correction and improved maps and ligand fitting obtained from ExCoR

**(A)** Error correction without map improvement. For these examples the error was automatically corrected for a subset of the ExCoR produced models. Ser213 side-chain in PDB 3MH8 is misplaced into the mainchain density, and the backbone carbonyl is also misplaced. Thirty-two different ExCoR-derived conformers from a single TLS grouping were examined, and the number of structures in that group is listed above each panel in parentheses. Only 2/32 ExCoR models corrected both errors. Asn90 from 3MH8 was misplaced and fixed by ExCoR. Thr128 and Val in 3MJ9 were misplaced and fixed by a subset of ExCoR models.

**(B)** Error correction with map improvement. Here ExCoR improved the maps and identified the correct conformers.

**(C)** Main-chain remodeling with improved maps.

**(D-F)** Improved ligand placement with ExCoR **(D)** Shown is the coenzyme A (PDB ID: 3NFD). The five membered ribose ring at the core of the ligand was misplaced into a water molecule in the deposited structure. Automated correction of the ribose placement with ExCoR allowed correcting shifts in the adenosine and phosphates. **(E)** Shown is a tamoxifen derivative (compound KN16) bound to ER $\alpha$  LBD, where only a subset of the models were correct for the hydrogen bonding, and a different set were correct for placement of the naphthalene group. **(F)** This ER ligand shows different ring conformers, which in turn alter the positioning of an adjacent hydroxyl group, and whether it forms the correct hydrogen bond.

**(G)** Identification of hidden alternate conformers from improved maps.

**A** 3MH8 A/213 (from PDB)

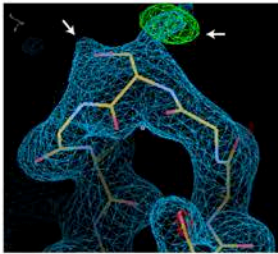

Not fixed (15/32)

Fixed rotamer (9/32)

Flipped peptide (4/32)

Fixed Both (2/32)

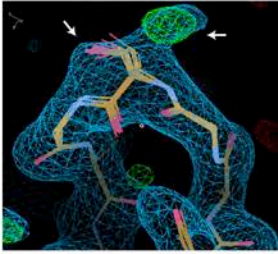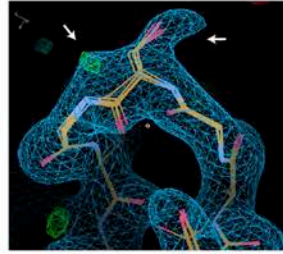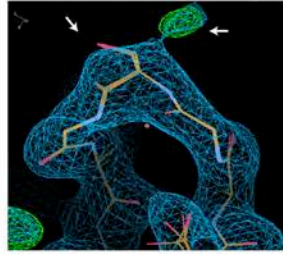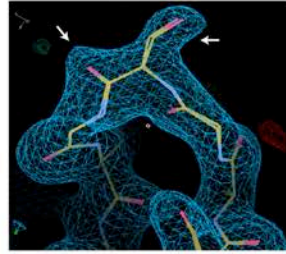

3MH8 B/90 (from PDB)

Fixed (7/32)

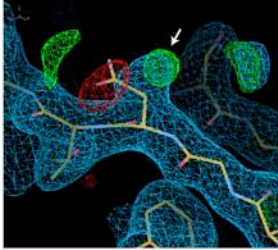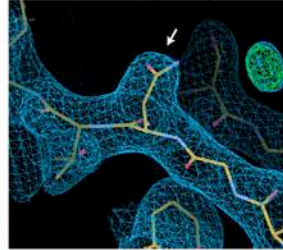

3MJ9 A/128 (from PDB)

Fixed Both (8/32)

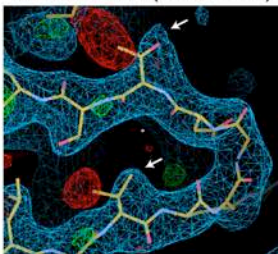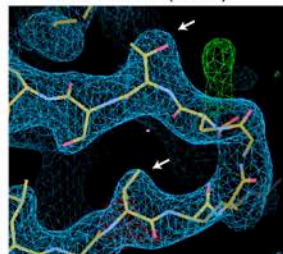

**Fig. S2A**

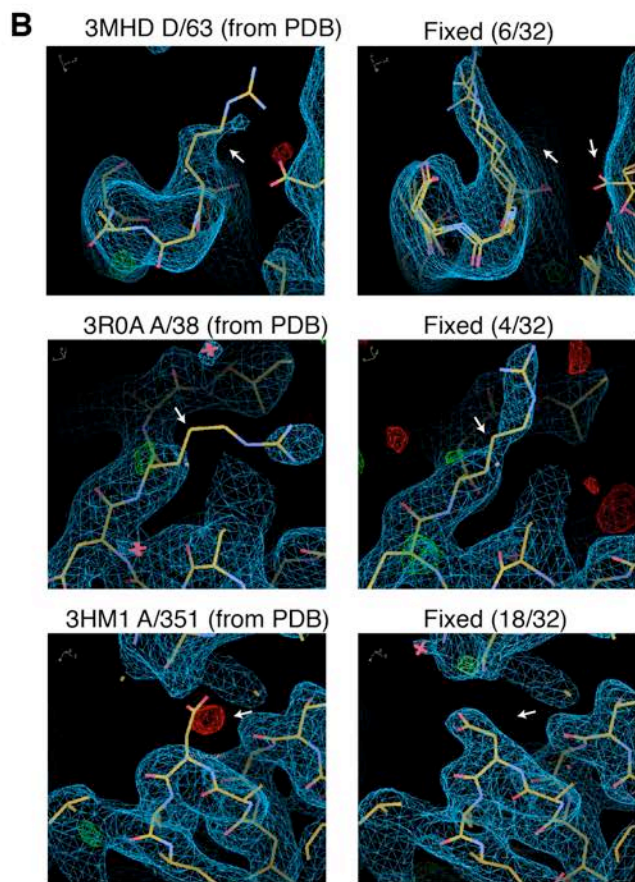

**Fig. S2B**



**D** 3NFD C/154 (from PDB)

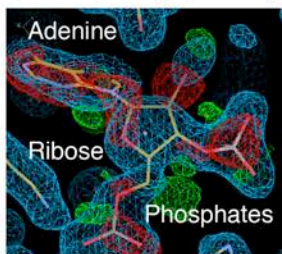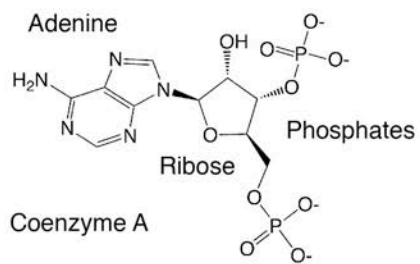

3NFD C/154 (from PDB)

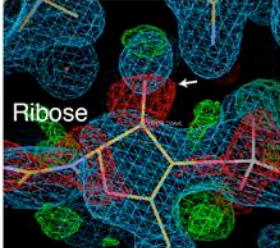

Improved (32/32)

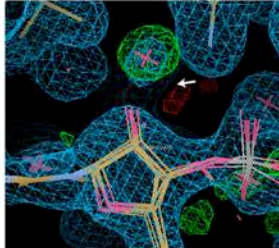

Superposed

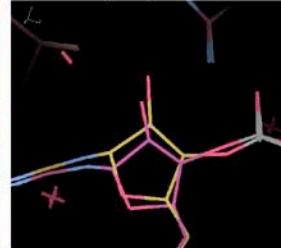

*PDB model (Yellow)*  
*ExCoR model (pink)*

3NFD C/154 (from PDB)

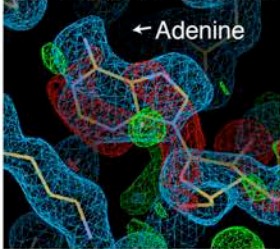

Improved (32/32)

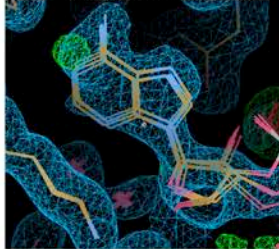

Superposed

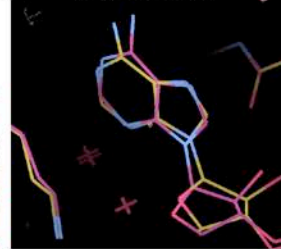

3NFD C/154 (from PDB)

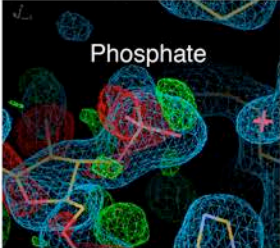

Improved (20/32)

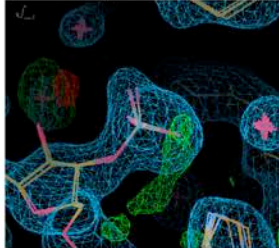

Incorrect (8/32)

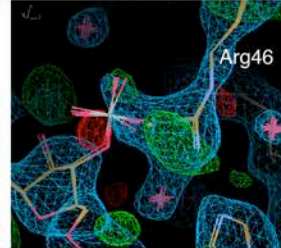

**Fig. S2D**

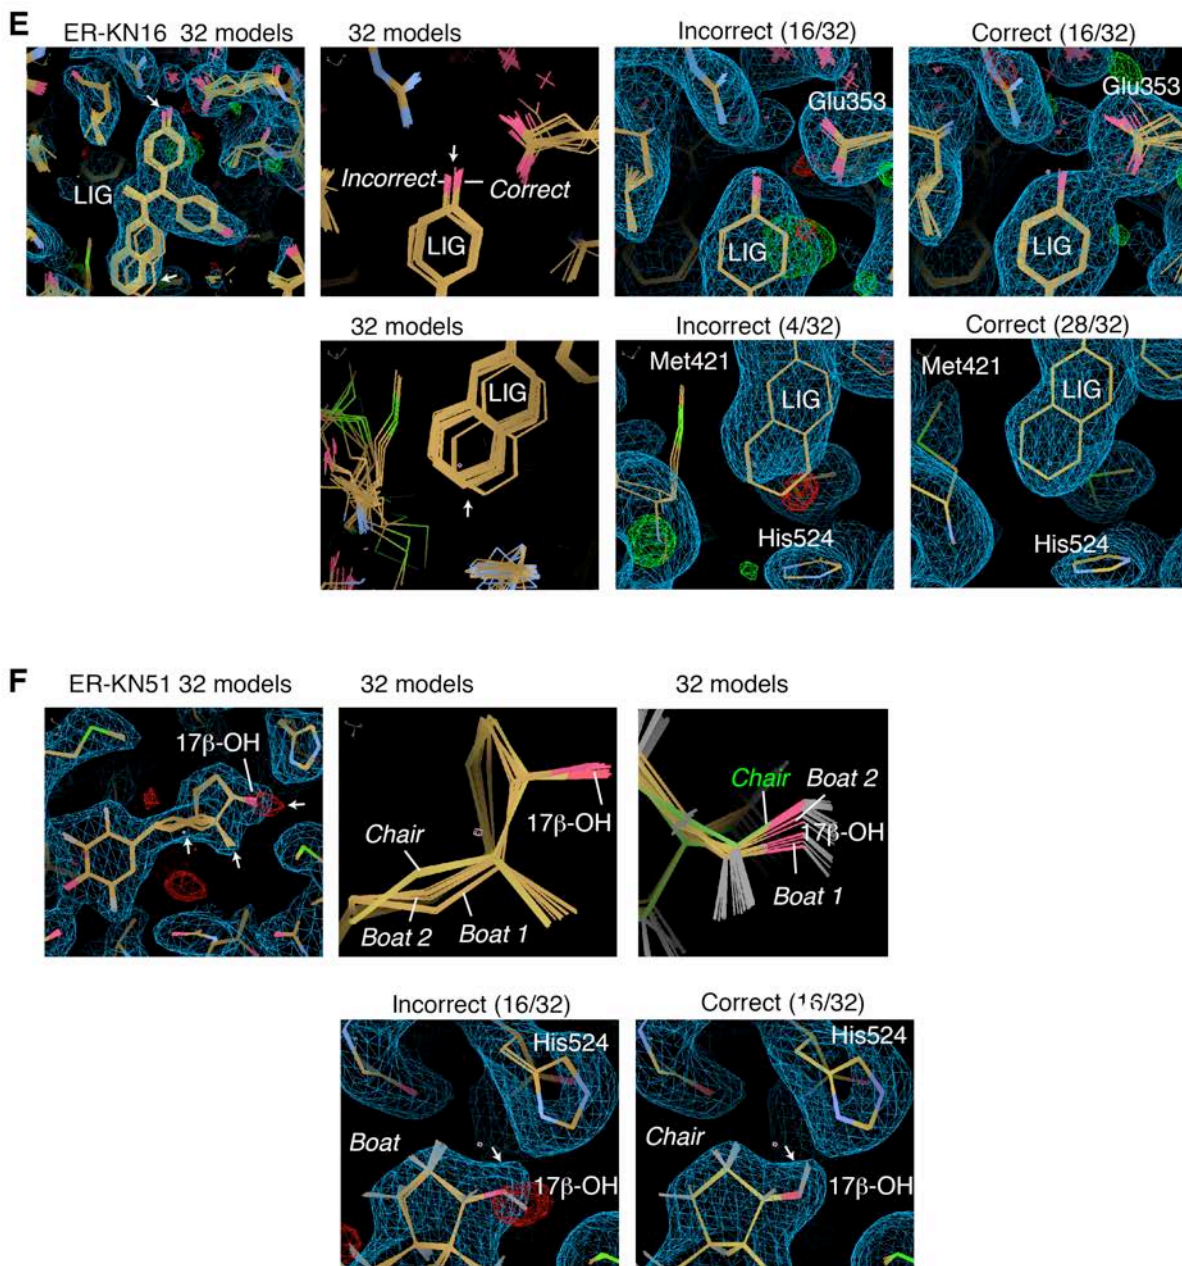

Fig. S2E-F

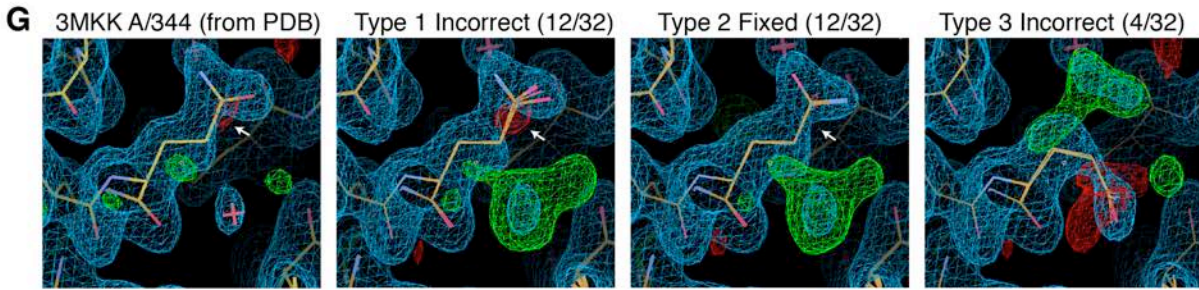

*None of the 256 correctly adopted the type 3 conformer, because there are 2 alternate conformers suggested by the electron density within the type 3 models.*

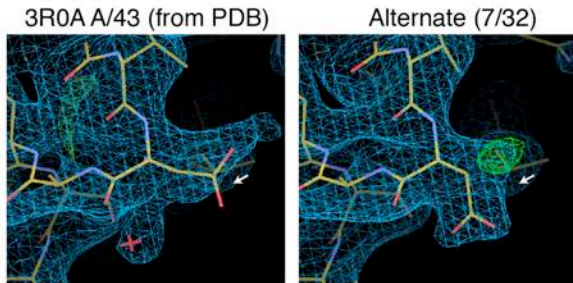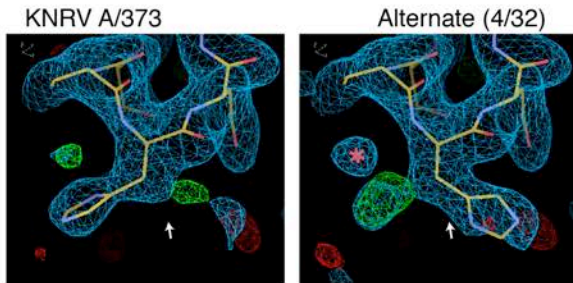

**Fig. S2G**

### Figure S3, related to Figure 3

#### ExCoR of protein structures

35 recently deposited structures from 4 different PSI centers/labs were refined with ExCoR. 18 new ER $\alpha$  ligand-binding domain models refined using ExCoR after molecular replacement and automated rebuilding using PHENIX AutoMR and AUTOBUILD, respectively are also shown. The X-axis contains the 32 permutations of C = NCS, R = rotamer search, P = peptide flip, N = NQH flip, and S = real space refinement. Each line represents the refinements with the specified number of TLS groups /protein chain. The black line (TLS0) represents the refinements without TLS, with the control refinement (individual XYZ and ADP) being the point on the farthest left. The TLS groupings were defined with the TLSMD server or TLS grouping program of PHENIX (TLSph). Note that the use of NCS restraints in the case of the two KN30-bound ER $\alpha$  structures dictated blocks of best and worst outcomes, and this NCS “block effect” occurred frequently. Also note for structure 3MHD, that the Rotamers+Peptide flip led to a profound >4% improvement in  $R_{\text{free}}$  when the number of TLS groups was reduced from 15 to 9.



PSI Models

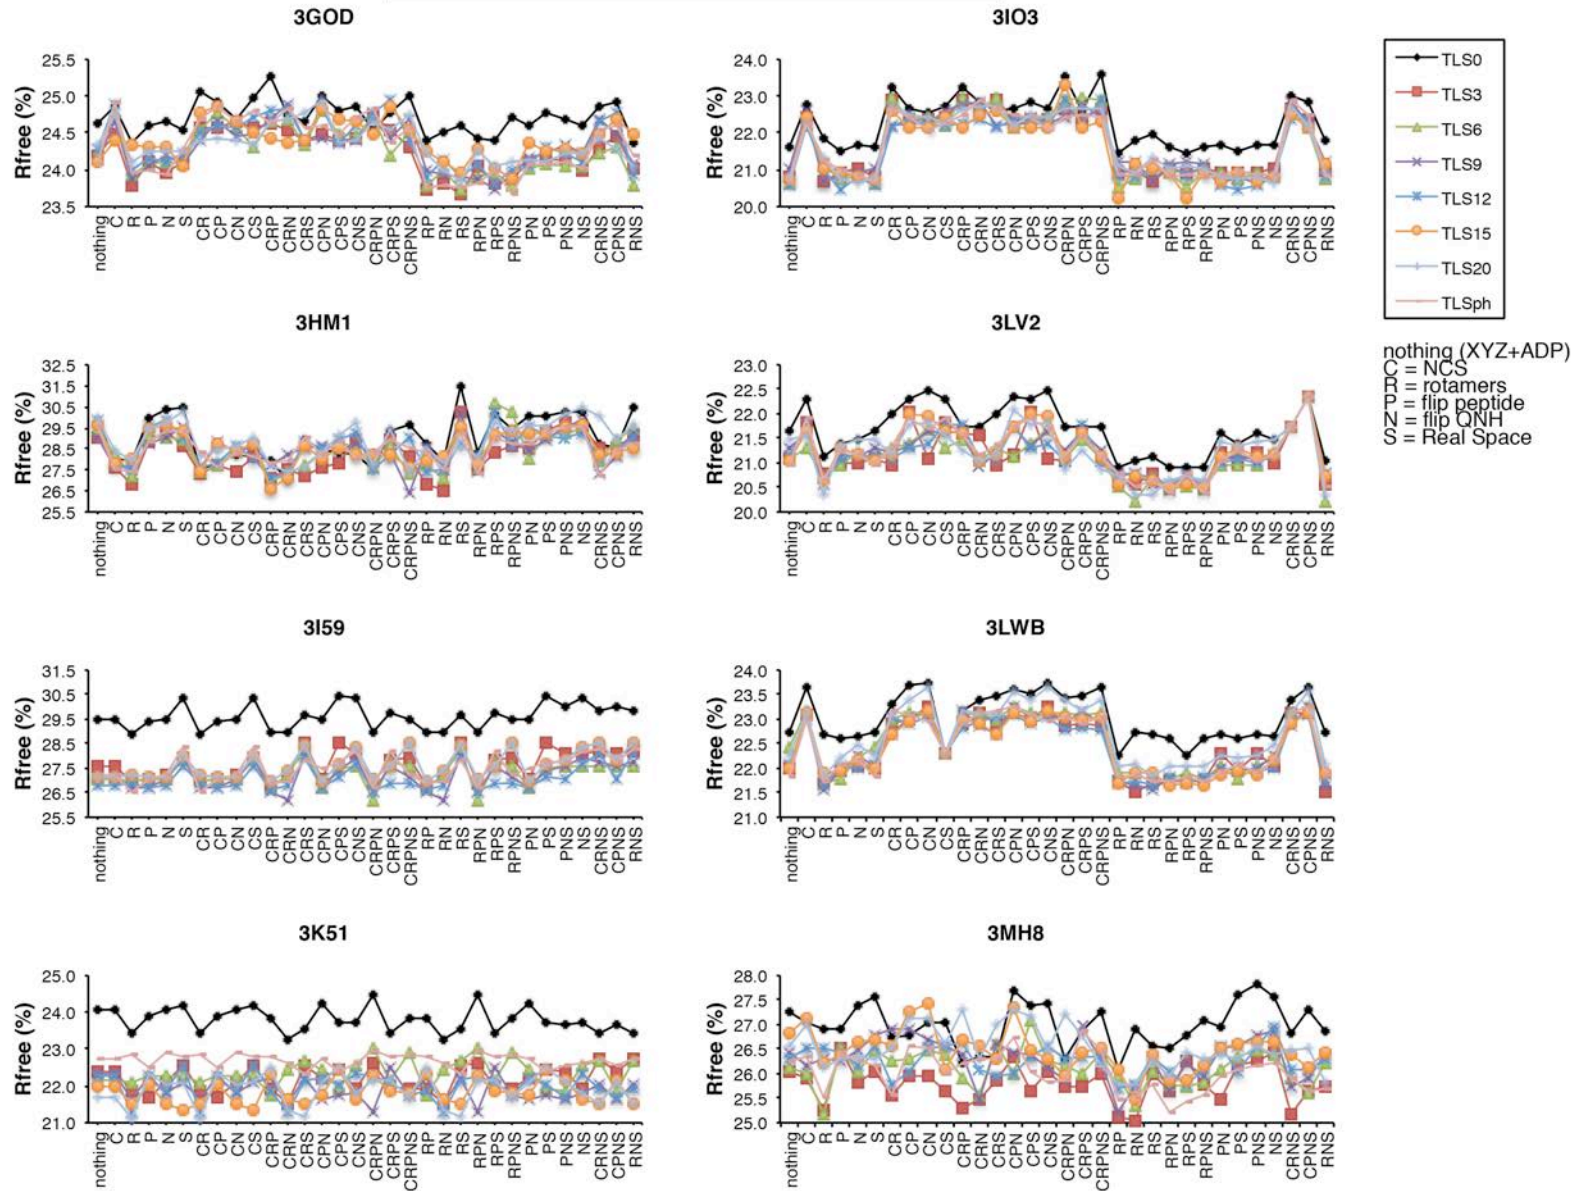

Fig. S3-1

PSI Models

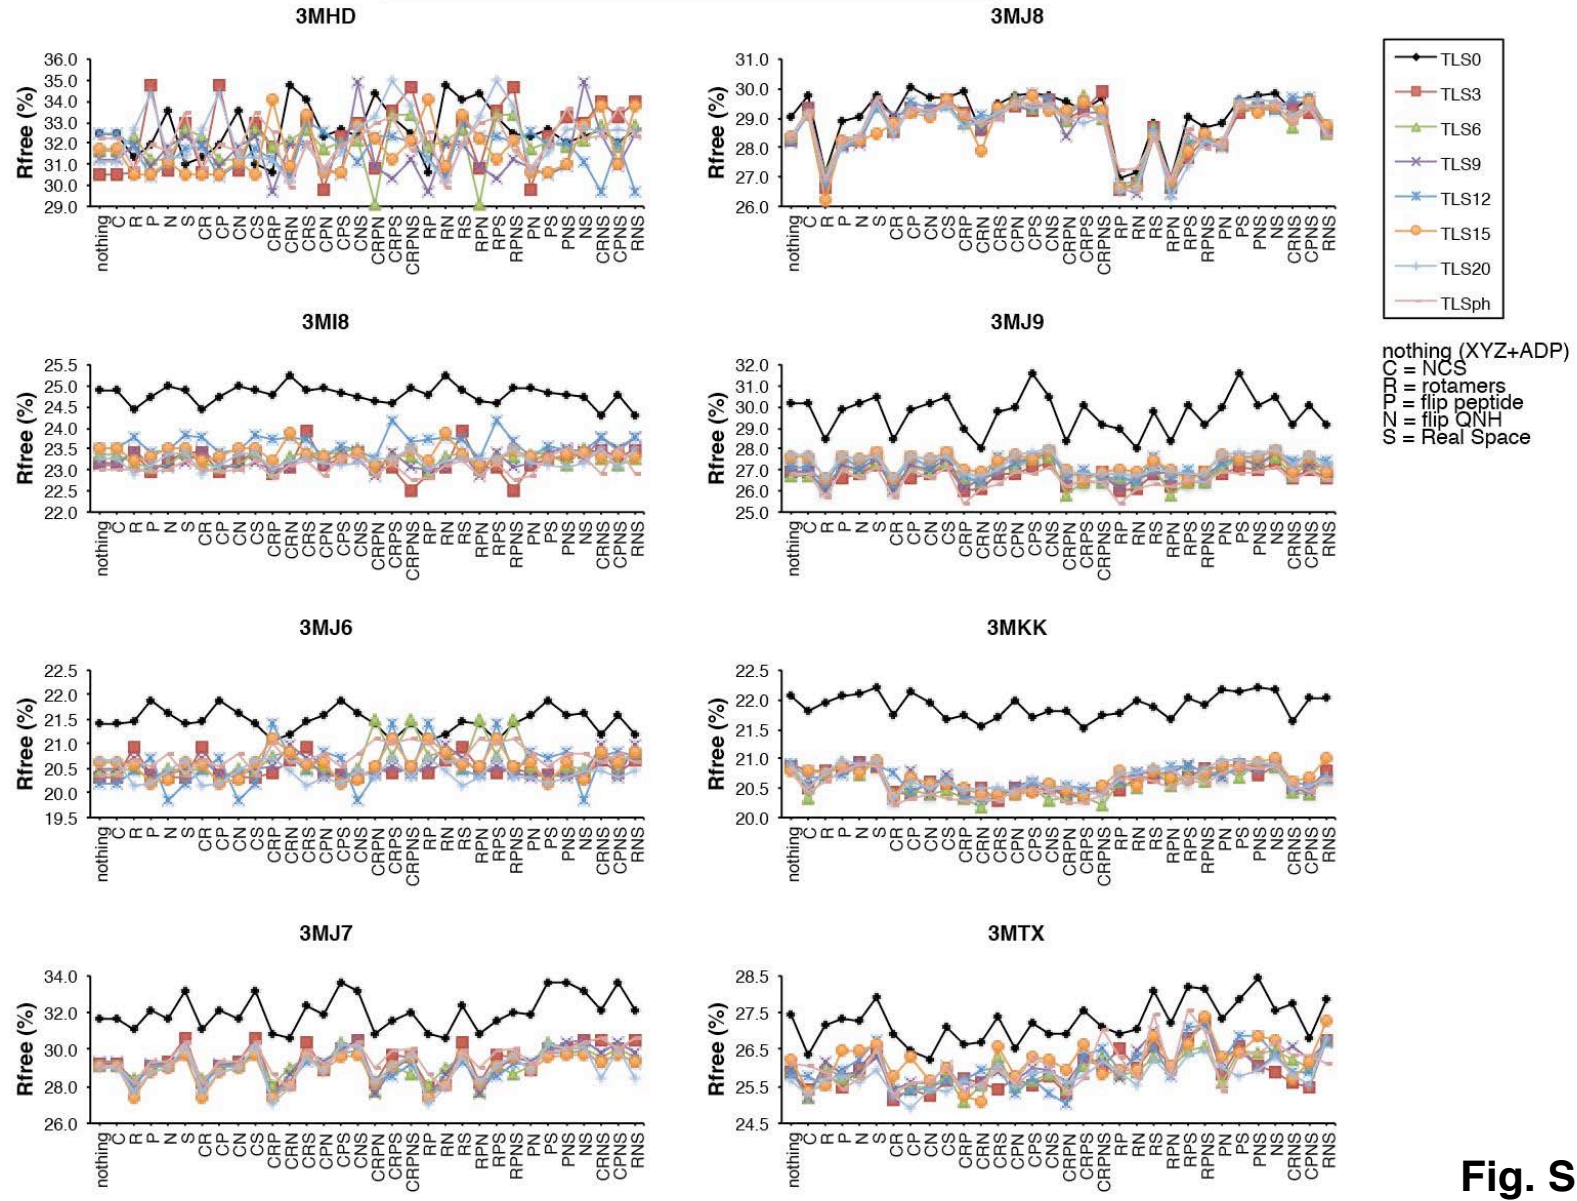

Fig. S3-2

PSI Models

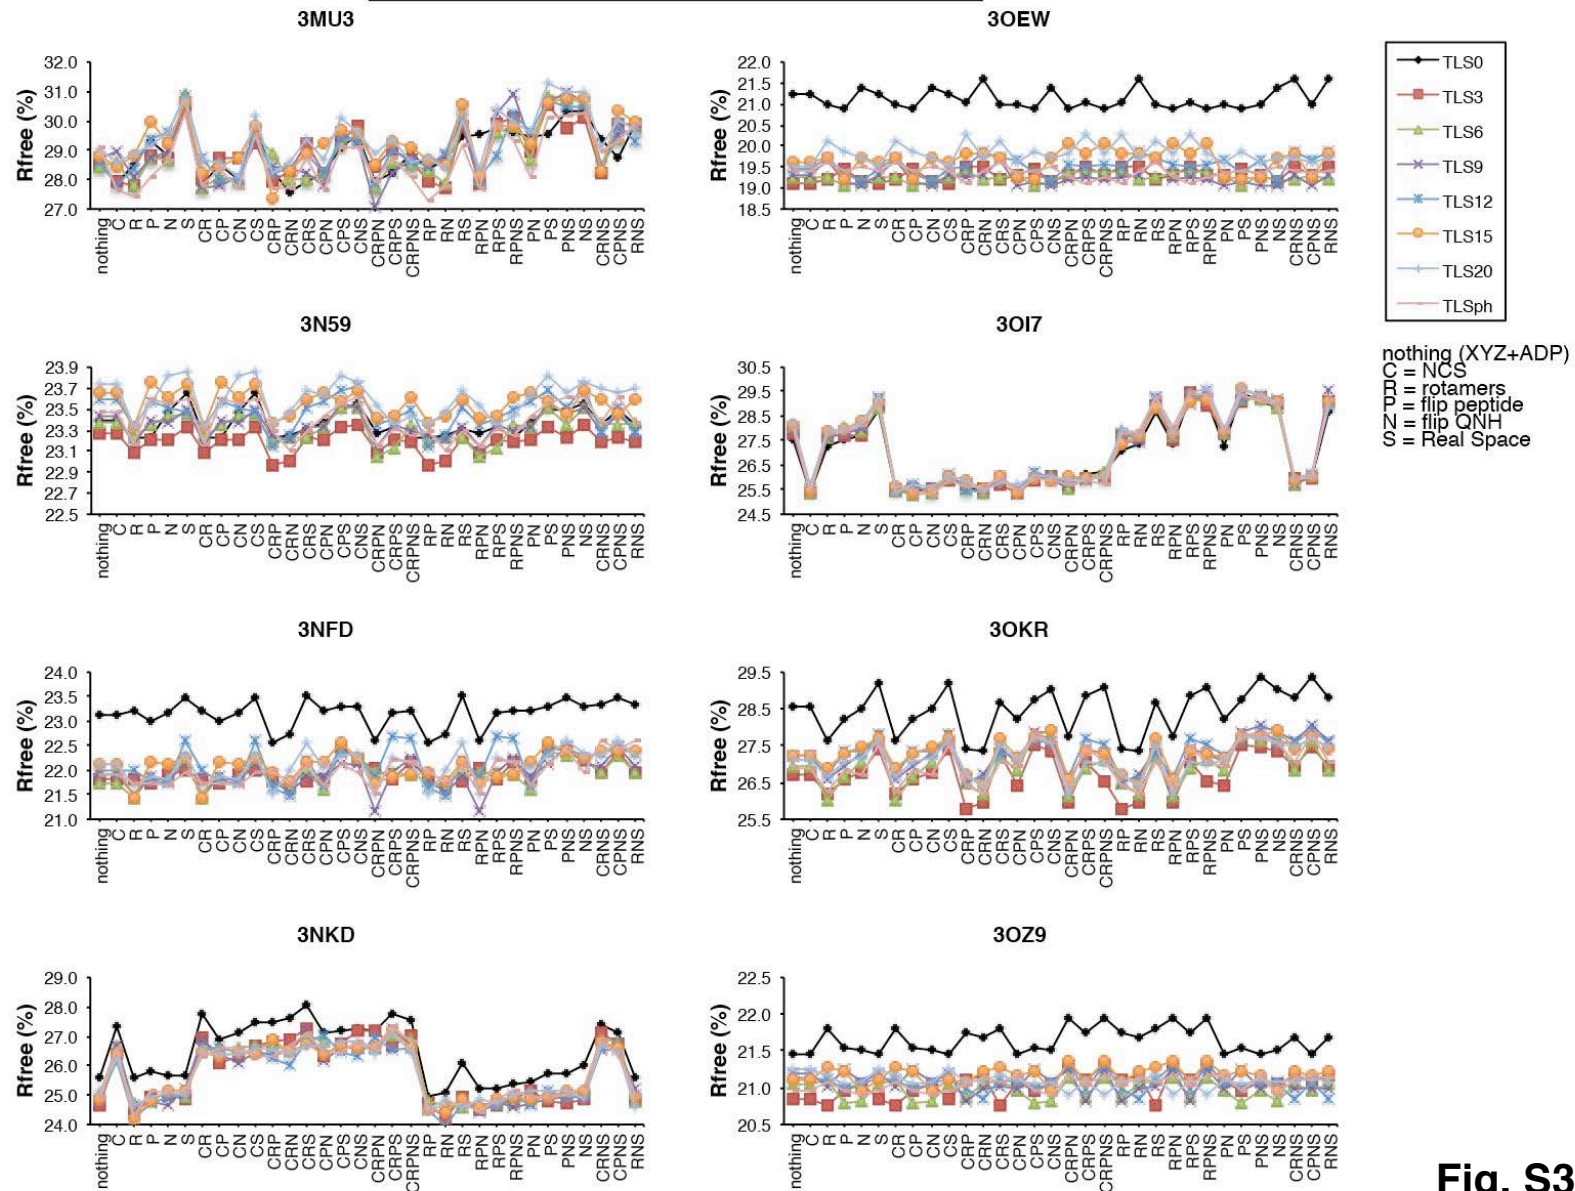

Fig. S3-3

PSI Models

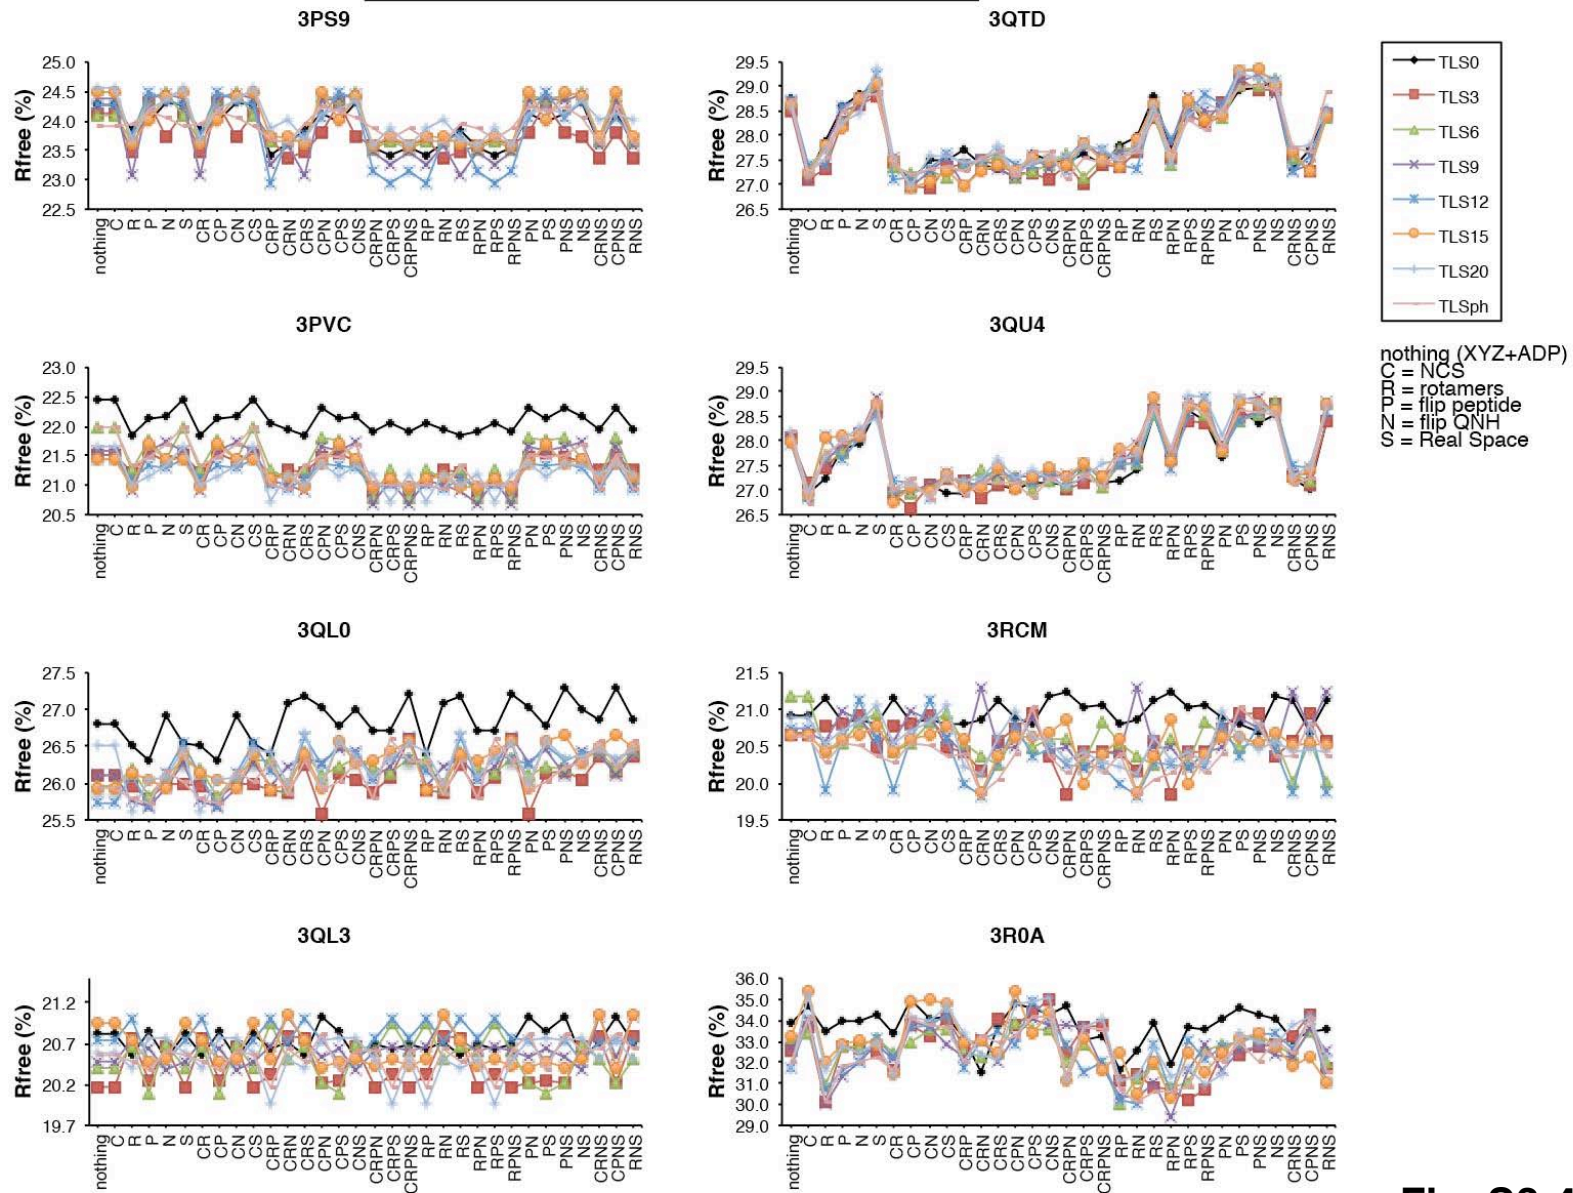

Fig. S3-4

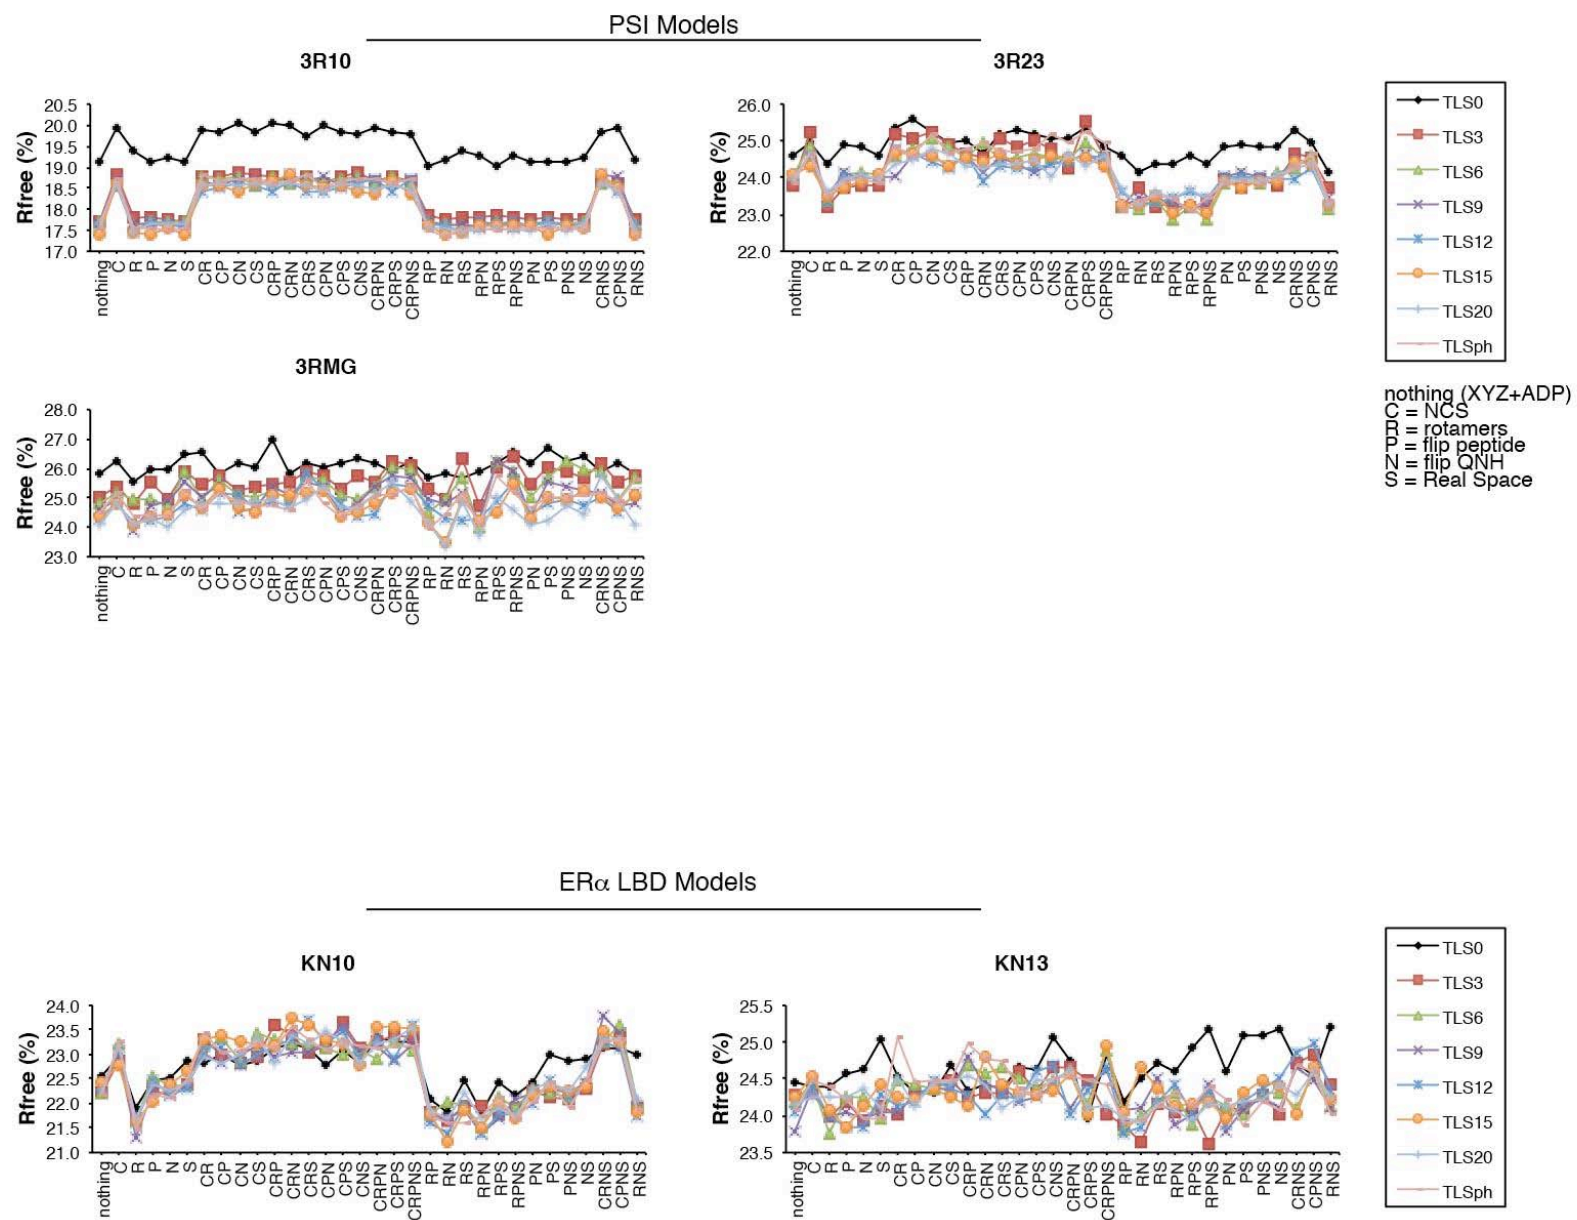

**Fig. S3-5**

ER $\alpha$  LBD Models

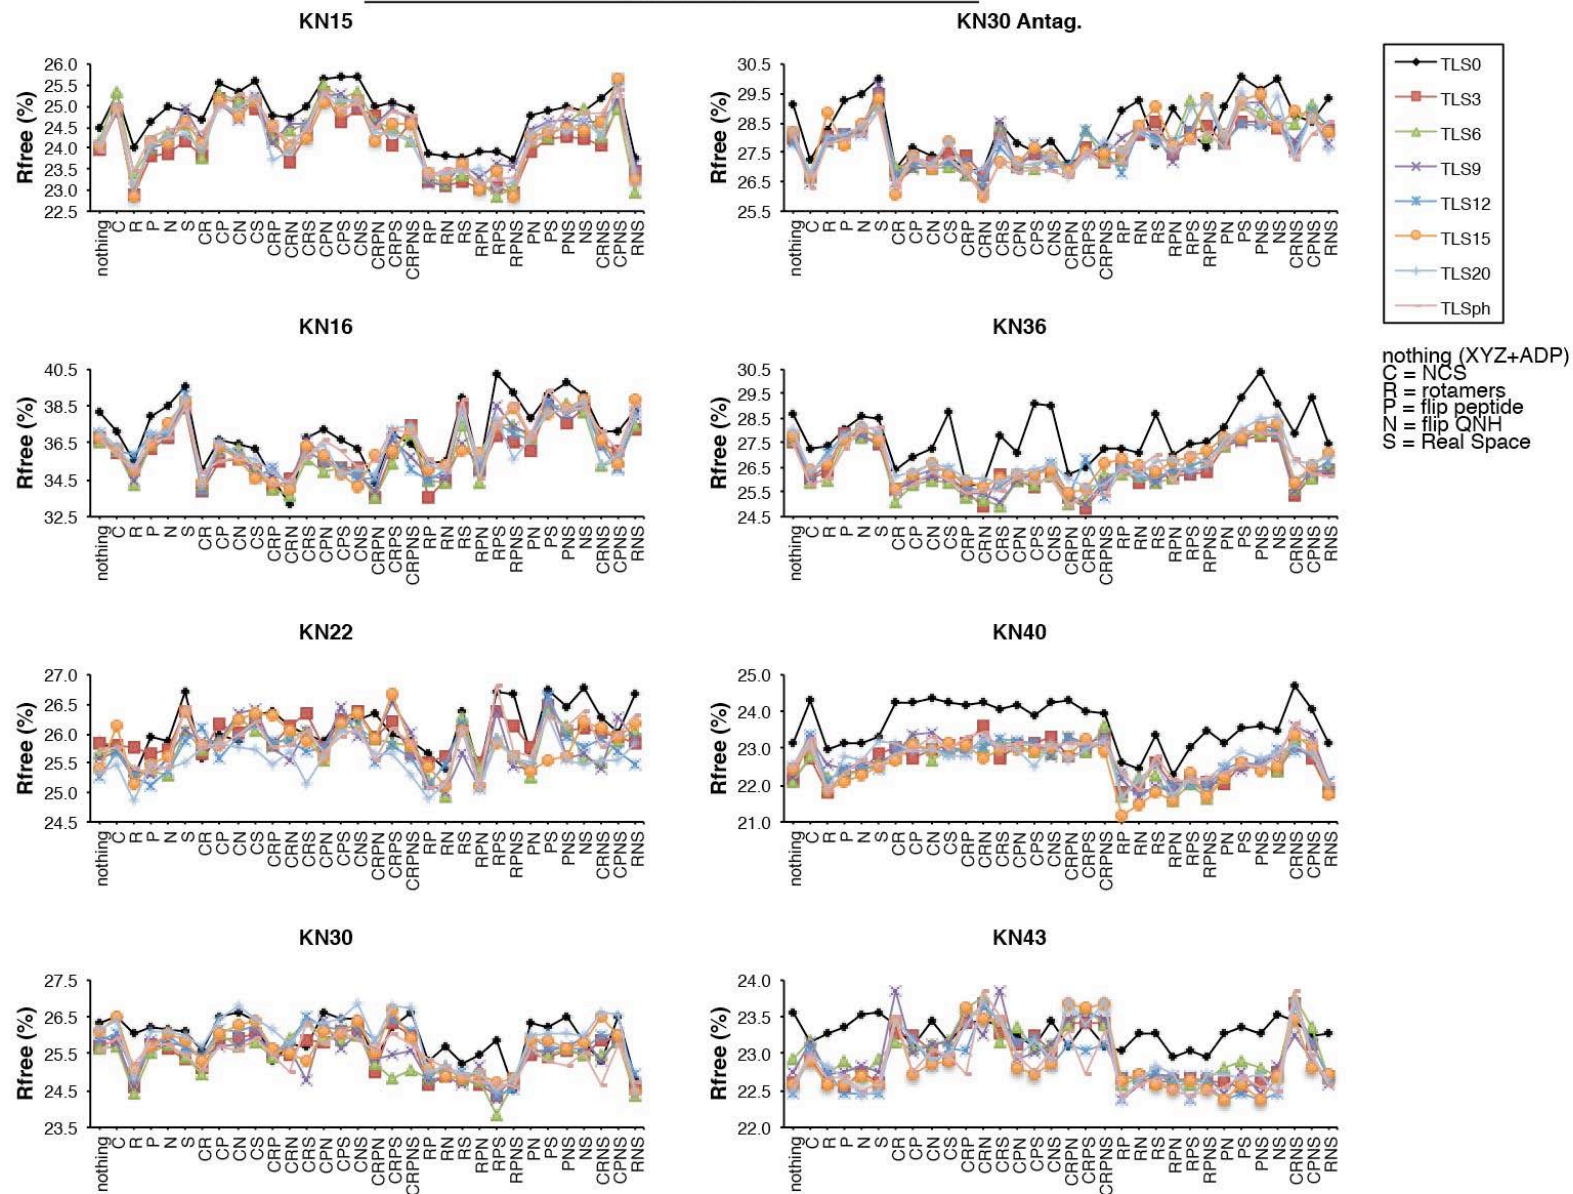

Fig. S3-6

ER $\alpha$  LBD Models

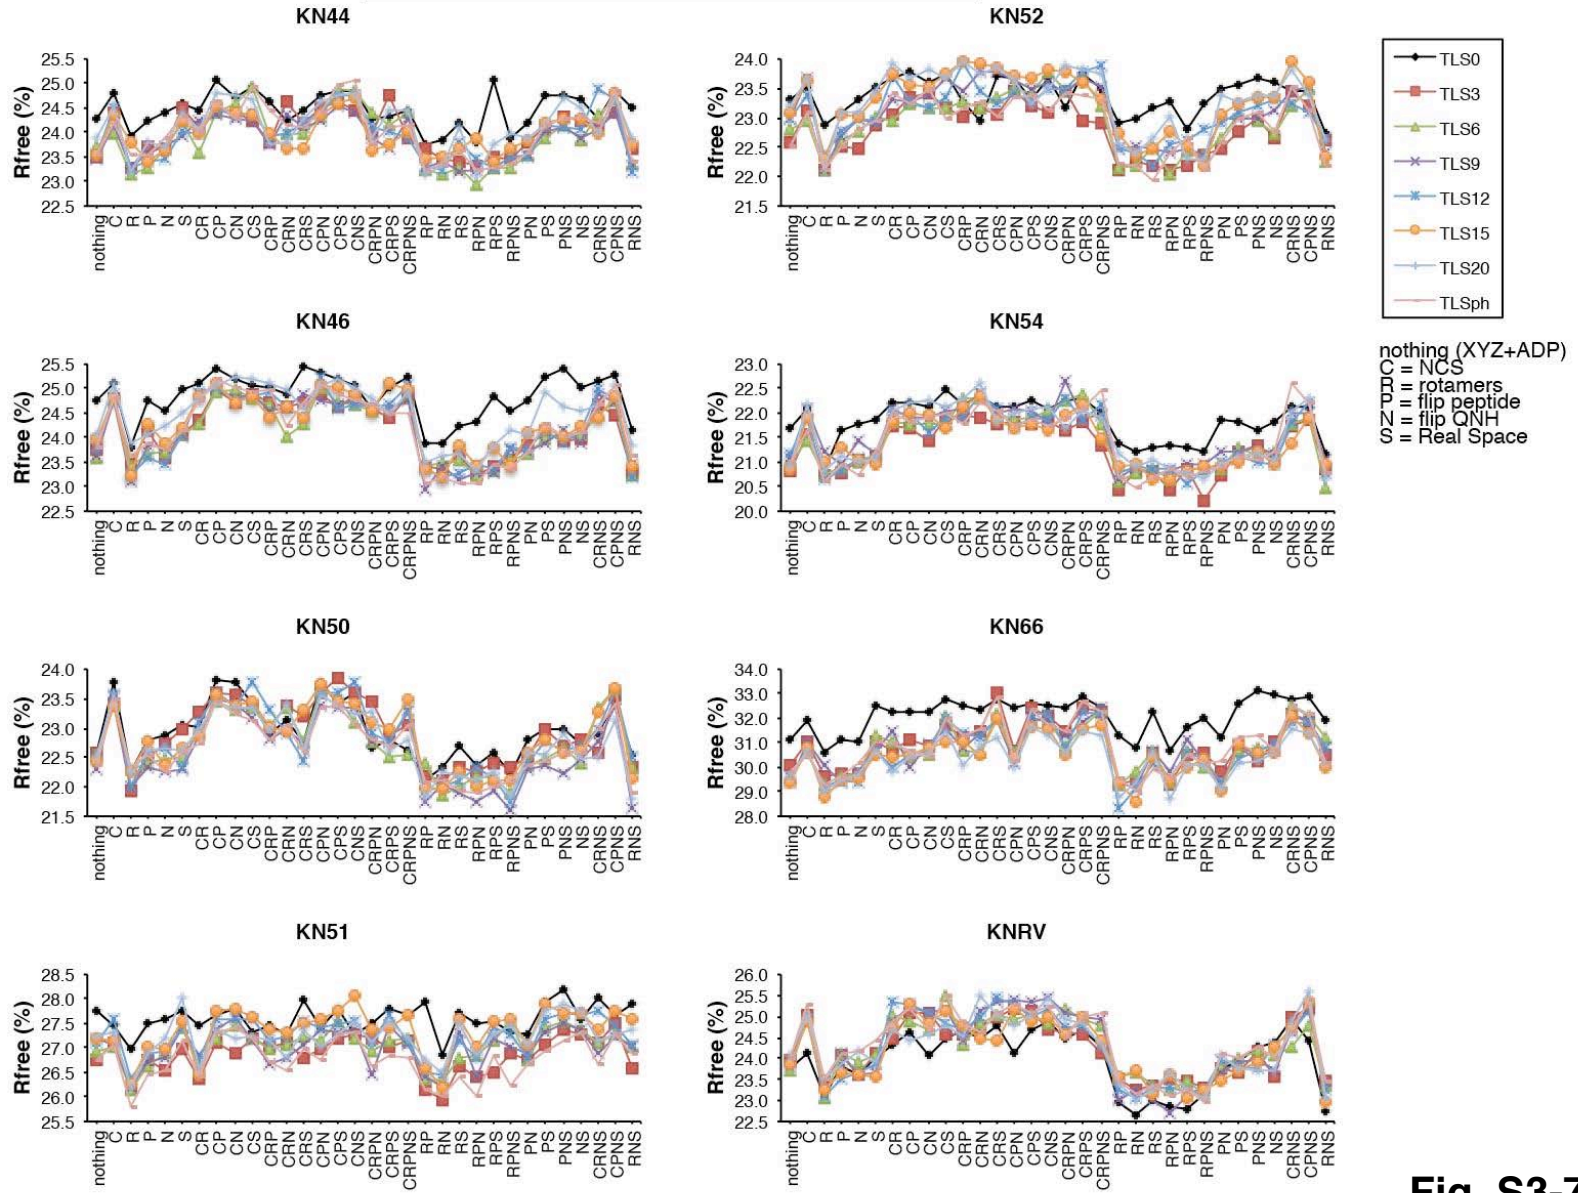

Fig. S3-7

#### Figure S4, related to Figure 4

(A) Changes in the number of TLS groups induced a wide range of  $R_{\text{free}}$  values indicating models of varied quality. For each structural genomics data set, the effects of TLS on the range of  $R_{\text{free}}$  are plotted for each of the other 32-parameter sets following ExCoR. TLS column indicates the overall effects of TLS, while TLS# shows the effects of changing the number of TLS groups. The top dotted line shows the overall range of  $R_{\text{free}}$  for the full 256 ExCoR set. The bottom dotted line shows the range in  $R_{\text{free}}$  in the control refinement from implementing 2 new  $R_{\text{free}}$  test sets, as a rough measure of the noise in the refinements.

(B) Effects of TLS on 3MJ9 model statistics. Results of refinements performed using the parameter files shown in panel B, are shown. Using TLS refinement led to lower R-free, R-work, RMSD from ideal bonds and angles, Rotamer outliers, Ramachandran allowed and outliers, and Mol probity clashscore.



**A**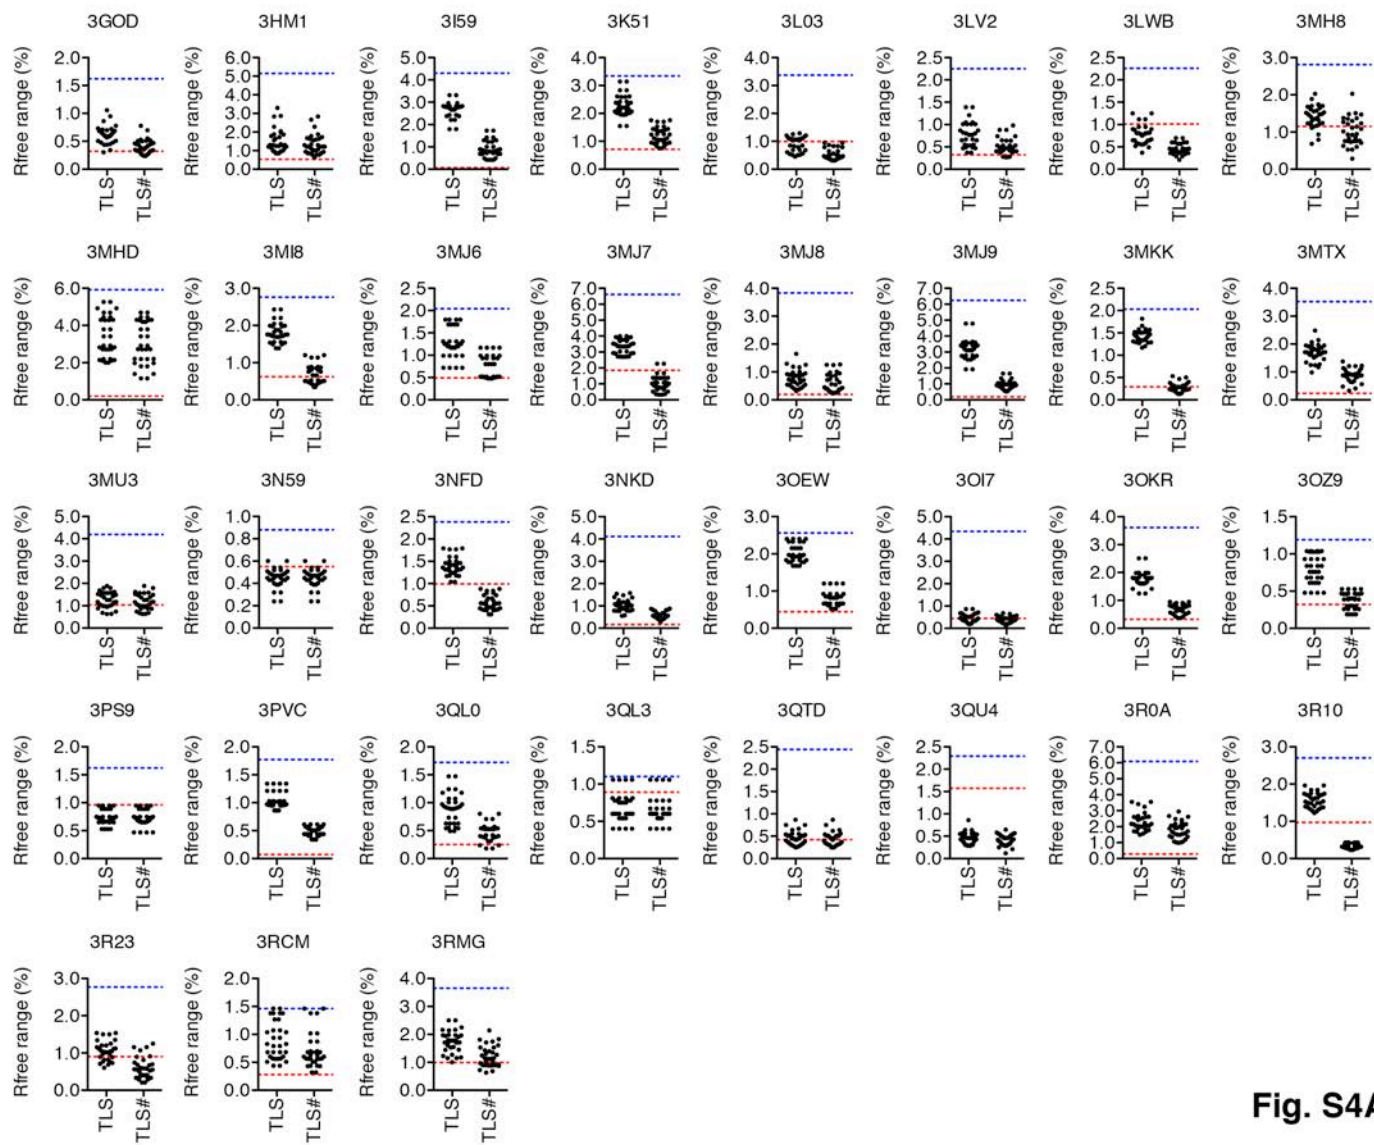**Fig. S4A**

**B**

| <b>Refinement Statistics</b> | <b>Without TLS</b> | <b>With TLS</b> |
|------------------------------|--------------------|-----------------|
| <b>R-free</b>                | 0.2917             | 0.2526          |
| <b>R-work</b>                | 0.1934             | 0.1823          |
| <b>RMSD bonds</b>            | 0.009              | 0.006           |
| <b>RMSD angles</b>           | 1.41               | 1.07            |
| <b>Ramachandran allowed</b>  | 11.003             | 9.871           |
| <b>Ramachandran outliers</b> | 5.502              | 2.265           |
| <b>Rotamer outliers</b>      | 14.763             | 6.503           |
| <b>Average B</b>             | 80.1               | 85.5            |
| <b>Clashscore</b>            | 71.421             | 53.050          |

**Fig. S4B**

**Table S1, related to Figure 3**

Effects of ExCoR on 35 recently deposited structural genomics models and newly solved structures of the estrogen receptor ligand-binding domain in complex with different ligands

| PDB ID | Res (Å) | R <sub>free</sub> (%) |                    | Rmsd bonds (Å) |       | Rmsd angles (°) |       | Average B |       | Wilson B |
|--------|---------|-----------------------|--------------------|----------------|-------|-----------------|-------|-----------|-------|----------|
|        |         | ExCoR                 | Start <sup>a</sup> | ExCoR          | Start | ExCoR           | Start | ExCoR     | Start |          |
| 3GOD   | 2.17    | 23.66                 | 25.51              | 0.003          | 0.018 | 0.673           | 1.664 | 31.0      | 31.9  | 27.4     |
| 3HM1   | 2.33    | 26.55                 | 29.16              | 0.003          | 0.008 | 1.048           | 1.573 | 66.1      | 70.7  | 39.6     |
| 3I59   | 2.29    | 26.17                 | 28.49              | 0.003          | 0.022 | 0.795           | 1.950 | 73.0      | 73.0  | 55.1     |
| 3K51   | 2.45    | 21.11                 | 24.91              | 0.004          | 0.028 | 0.854           | 0.822 | 68.7      | 79.1  | 44.6     |
| 3L03   | 1.90    | 20.24                 | 22.77              | 0.003          | 0.014 | 1.050           | 1.790 | 46.8      | 44.8  | 31.5     |
| 3LV2   | 2.18    | 20.23                 | 22.62              | 0.003          | 0.011 | 0.810           | 1.254 | 31.6      | 27.3  | 29.3     |
| 3LWB   | 2.10    | 21.50                 | 22.14              | 0.007          | 0.005 | 1.068           | 1.104 | 44.7      | 45.9  | 34.2     |
| 3MH8   | 2.00    | 25.03                 | 27.93              | 0.003          | 0.008 | 0.833           | 1.152 | 52.4      | 49.7  | 41.7     |
| 3MHD   | 2.90    | 29.07                 | 34.65              | 0.003          | 0.011 | 1.054           | 1.265 | 130.8     | 147.3 | 78.3     |
| 3MI8   | 2.95    | 23.38                 | 26.72              | 0.011          | 0.008 | 1.415           | 1.116 | 91.6      | 87.5  | 76.0     |
| 3MJ6   | 2.19    | 19.85                 | 21.88              | 0.008          | 0.016 | 1.198           | 1.694 | 40.9      | 37.6  | 34.0     |
| 3MJ7   | 2.80    | 27.00                 | 28.21              | 0.005          | 0.011 | 1.315           | 1.315 | 85.1      | 68.2  | 63.2     |
| 3MJ8   | 2.94    | 26.22                 | 28.21              | 0.003          | 0.006 | 0.695           | 0.957 | 59.8      | 54.7  | 56.5     |
| 3MJ9   | 2.95    | 25.39                 | 28.80              | 0.005          | 0.007 | 0.985           | 1.057 | 83.4      | 77.2  | 75.9     |
| 3MKK   | 1.91    | 20.18                 | 25.79              | 0.006          | 0.015 | 1.090           | 1.424 | 29.2      | 9.6   | 23.1     |
| 3MTX   | 2.00    | 24.90                 | 29.71              | 0.004          | 0.019 | 1.491           | 1.993 | 44.7      | 37.0  | 29.6     |
| 3MU3   | 2.40    | 27.06                 | 28.98              | 0.007          | 0.021 | 1.256           | 1.970 | 36.4      | 32.0  | 33.6     |
| 3N59   | 2.52    | 22.97                 | 24.93              | 0.003          | 0.006 | 0.682           | 0.905 | 41.0      | 37.5  | 38.0     |
| 3NFD   | 1.89    | 21.16                 | 27.64              | 0.006          | 0.020 | 0.989           | 1.930 | 28.4      | 26.0  | 21.5     |
| 3NKD   | 1.95    | 23.95                 | 26.94              | 0.003          | 0.022 | 0.728           | 1.691 | 39.2      | 33.8  | 28.3     |
| 3OEW   | 2.20    | 19.03                 | 21.24              | 0.008          | 0.012 | 1.142           | 1.343 | 45.4      | 43.1  | 41.4     |
| 3OI7   | 2.40    | 25.28                 | 26.20              | 0.004          | 0.013 | 0.850           | 1.394 | 26.8      | 23.9  | 25.8     |
| 3OKR   | 2.40    | 25.78                 | 27.62              | 0.005          | 0.009 | 0.974           | 1.258 | 69.6      | 68.7  | 57.6     |
| 3OZ9   | 1.60    | 20.75                 | 23.34              | 0.003          | 0.006 | 0.840           | 1.074 | 21.3      | 19.6  | 13.2     |
| 3PS9   | 2.54    | 22.94                 | 24.54              | 0.004          | 0.012 | 0.868           | 1.481 | 26.4      | 22.5  | 24.6     |
| 3PVC   | 2.31    | 20.69                 | 23.37              | 0.004          | 0.026 | 1.024           | 1.756 | 30.8      | 25.9  | 25.3     |
| 3QL0   | 1.60    | 25.58                 | 27.14              | 0.010          | 0.014 | 1.572           | 1.597 | 19.8      | 19.3  | 14.3     |
| 3QL3   | 1.80    | 19.95                 | 22.15              | 0.009          | 0.017 | 1.576           | 1.601 | 17.8      | 16.4  | 12.9     |
| 3QTD   | 2.70    | 26.91                 | 28.58              | 0.003          | 0.024 | 0.728           | 1.739 | 38.8      | 32.5  | 33.4     |
| 3QU4   | 2.10    | 26.64                 | 29.36              | 0.004          | 0.009 | 0.876           | 1.173 | 37.3      | 36.2  | 30.1     |
| 3R0A   | 2.30    | 29.36                 | 34.85              | 0.003          | 0.014 | 0.829           | 1.497 | 63.9      | 51.3  | 49.2     |
| 3R10   | 2.00    | 17.83                 | 19.07              | 0.006          | 0.008 | 0.942           | 1.199 | 25.5      | 20.3  | 20.1     |
| 3R23   | 2.50    | 23.02                 | 25.51              | 0.002          | 0.012 | 0.639           | 1.518 | 56.1      | 44.9  | 40.2     |
| 3RCM   | 2.05    | 19.83                 | 25.56              | 0.003          | 0.014 | 0.740           | 1.449 | 22.1      | 18.4  | 17.6     |

3RMG 2.30 23.35 26.80 0.003 0.010 0.692 1.093 77.5 67.6 46.7

| ER LBD Model      | Res (Å) | R <sub>free</sub> (%) |         |       | Rmsd bonds (Å)     |         |       | Rmsd angles (°)    |         |       |
|-------------------|---------|-----------------------|---------|-------|--------------------|---------|-------|--------------------|---------|-------|
|                   |         | ExCoR                 | Control | Start | ExCoR              | Control | Start | ExCoR              | Control | Start |
| KN10              | 2.24    | 21.22                 | 22.58   | 25.63 | 0.003              | 0.003   | 0.027 | 0.645              | 0.640   | 1.635 |
| KN13              | 2.24    | 23.62                 | 24.45   | 26.51 | 0.004              | 0.003   | 0.014 | 0.793              | 0.655   | 1.327 |
| KN15 <sup>c</sup> | 2.24    | 22.83                 | 24.46   | 26.00 | 0.003              | 0.002   | 0.016 | 0.709              | 0.595   | 1.591 |
| KN16*             | 2.16    | 33.19                 | 38.17   | 37.97 | 0.010              | 0.003   | 0.029 | 1.471              | 0.796   | 2.590 |
| KN22              | 1.93    | 24.86                 | 25.89   | 26.90 | 0.003              | 0.002   | 0.026 | 0.692              | 0.551   | 2.427 |
| KN30*             | 2.33    | 25.99                 | 29.10   | 27.50 | 0.037 <sup>b</sup> | 0.020   | 0.022 | 2.662 <sup>b</sup> | 2.784   | 1.935 |
| KN30              | 2.25    | 23.82                 | 26.36   | 27.33 | 0.010              | 0.014   | 0.018 | 1.643              | 1.940   | 1.758 |
| KN36              | 2.38    | 24.98                 | 27.98   | 27.57 | 0.048 <sup>b</sup> | 0.013   | 0.019 | 3.248 <sup>b</sup> | 2.149   | 1.894 |
| KN40 <sup>c</sup> | 1.93    | 21.19                 | 23.13   | 25.86 | 0.004              | 0.003   | 0.028 | 0.766              | 0.652   | 1.555 |
| KN43              | 2.24    | 22.35                 | 23.57   | 23.92 | 0.003              | 0.003   | 0.007 | 0.630              | 0.603   | 0.961 |
| KN44              | 2.24    | 22.94                 | 24.26   | 25.25 | 0.003              | 0.005   | 0.014 | 1.204              | 0.791   | 1.382 |
| KN46              | 2.24    | 22.94                 | 24.74   | 26.61 | 0.003              | 0.003   | 0.026 | 0.706              | 0.625   | 1.461 |
| KN50              | 2.24    | 21.59                 | 22.59   | 24.27 | 0.003              | 0.003   | 0.013 | 0.602              | 0.599   | 1.368 |
| KN51              | 2.24    | 25.81                 | 27.74   | 28.27 | 0.003              | 0.002   | 0.013 | 0.715              | 0.571   | 1.416 |
| KN52              | 2.24    | 21.93                 | 23.32   | 24.71 | 0.002              | 0.002   | 0.013 | 0.544              | 0.504   | 1.302 |
| KN54              | 1.93    | 20.23                 | 21.69   | 23.57 | 0.004              | 0.003   | 0.010 | 0.711              | 0.664   | 1.172 |
| KN66              | 1.98    | 28.33                 | 31.14   | 34.57 | 0.004              | 0.002   | 0.019 | 0.878              | 0.584   | 1.802 |
| KNRV              | 2.20    | 22.66                 | 23.74   | 26.92 | 0.003              | 0.002   | 0.018 | 0.679              | 0.619   | 1.642 |

\*Antagonist-bound conformation

<sup>a</sup> Statistics for each model starting downloaded from the PDB were re-calculated and used as a control.

<sup>b</sup> Unusually high RMSD values likely due to receptor conformation, NCS, ligand-receptor dynamics, and/or inadequate ligand restraints.

<sup>c</sup> ER LBD models KN15 (PDB ID: 4IWC) and KN40 (PDB ID: 4IWF) were later completed and published elsewhere while this manuscript was under review. Other ER LBD models will be completed and published elsewhere.

## Supplemental References

Lovell, S.C., Word, J.M., Richardson, J.S., and Richardson, D.C. (2000). The penultimate rotamer library. *Proteins* *40*, 389-408.

Word, J.M., Lovell, S.C., Richardson, J.S., and Richardson, D.C. (1999). Asparagine and glutamine: using hydrogen atom contacts in the choice of side-chain amide orientation. *J Mol Biol* *285*, 1735-1747.
